1            **Neural Flip-Flops II: The Role of Cascaded Oscillators in Short-Term**  
2                                    **Memory, EEGs, and Epilepsy**

3    Lane Yoder

4    Department of Science and Mathematics, retired

5    University of Hawaii, Kapiolani

6    Honolulu, Hawaii

7    [LYoder@hawaii.edu](mailto:LYoder@hawaii.edu)

8    [NeuralNanoNetworks.com](http://NeuralNanoNetworks.com)

## 9 **Abstract**

10 By enabling many brain structures' state changes, the explicit cascaded oscillators  
11 proposed here can generate the rhythmic neural activity found in EEGs. The function of such  
12 synchronization in information processing systems is timing error avoidance. The narrow  
13 requirement for the oscillator input pulse duration suggests a possible relationship to the  
14 abnormal electrical activity characteristic of epileptic seizures. Together, flip-flops and  
15 synchronization by oscillators suggest a resolution to the longstanding controversy of whether  
16 short-term memory depends on neurons firing persistently or in brief, coordinated bursts.

17 The proposed cascade of oscillators consists of a ring oscillator and four toggle flip-flops  
18 connected in sequence. The novel oscillator and toggle are composed of three and six neurons,  
19 respectively. Their operation depends only on minimal properties of excitatory and inhibitory  
20 inputs.

21 The hypothesis that cascaded oscillators produce EEG phenomena implies that the  
22 distribution of EEG frequencies is determined by just two parameters, the mean ( $\mu_d$ ) and standard  
23 deviation ( $\sigma_d$ ) of the delay times of neurons that make up the initial oscillators in the cascades.  
24 For example, if  $\mu_d$  and  $\sigma_d$  are measured in milliseconds, the boundary separating the alpha and  
25 beta frequency bands is

$$26 \quad 125/\{\mu_d + \sqrt{[(\mu_d)^2 + (\sigma_d)^2 \ln(4)]}\} \text{ hertz.}$$

27 With 4 and 1.5 ms being the best available estimates for  $\mu_d$  and  $\sigma_d$ , respectively, this predicted  
28 boundary value is 14.9 Hz, which is within the range of commonly cited estimates obtained  
29 empirically from EEGs. Four and 1.5 ms also accurately predict the peaks and other boundaries  
30 of the five major EEG frequency bands.

31

32 **Key words:** epilepsy; epileptic seizures; EEG; electroencephalogram; electroencephalography;  
33 brainwave; short-term memory; working memory; flip-flop; JK flip-flop; toggle; oscillator;  
34 cascaded oscillator; neuronal network; neural network; neural logic circuit; explicit neural  
35 model; bursting neuron; color vision; olfaction; central pattern generator; CPG

36

## 37 **Significance statement**

38           The neuronal model proposed here implies several major aspects of  
39 electroencephalography. The matched periods of neural activity found in EEGs, and their wide  
40 distribution across the brain and across the frequency spectrum, follow from selective pressure  
41 for a biologically useful function: timing error avoidance for diverse brain functions in the trade-  
42 off between speed and accuracy. This activity can be achieved with a simple organization of  
43 synaptic connections and minimal neuron capabilities of excitation and inhibition. The  
44 multimodal distribution of EEG frequencies is an explicit function of the mean and variance of  
45 neuron delay times. The model suggests a relationship to epileptic seizures and a resolution to a  
46 short-term memory controversy. Two EEG characteristics make other models implausible.

## 47 **1. Introduction**

48           This article is the fifth in a series of articles that show how neurons can be connected to  
49 process information. These articles show that the field of logic circuit design can inform  
50 neuroscience as well as vice versa. The first three articles [1-3] showed that a neural fuzzy logic  
51 decoder can produce the major phenomena of color vision and olfaction. The fourth article [4]  
52 showed that neurons can be connected to form Boolean neural flip-flops (NFFs) that are robust  
53 and generate the major phenomena of short-term memory. A flip-flop is a mechanism that can  
54 be set repeatedly to either one of two stable states, commonly labeled 0 and 1. Flip-flops are the  
55 basic building blocks of sequential logic systems, whose logic operations depend on both the  
56 current inputs and past sequence of inputs. Some of the material in [4] will be reviewed and  
57 used here.

58           The present article shows how neurons can be connected to generate major phenomena of  
59 electroencephalography. Only minimal properties of the strengths of excitatory and inhibitory  
60 signals are required for the networks to accomplish this. These properties are consistent with  
61 more complex neuron properties, such as synaptic plasticity and the effects of neuromodulators,

62 but the minimal properties are sufficient to produce the results found here. The network  
63 proposed here together with NFFs proposed in [4] suggest a resolution to the longstanding  
64 controversy of whether short-term memory depends on neurons firing persistently or in brief,  
65 coordinated bursts [5, 6].

66 The hypothesis that cascaded oscillators produce the distribution of frequencies found in  
67 EEGs is consistent with available data, but further research is needed for a rigorous test. The  
68 hypothesis implies that the entire distribution of EEG frequencies in bands is determined by the  
69 mean and variance of the delay times of neurons that make up the initial oscillators in the  
70 cascades. With samples of neuron delay times and EEG frequencies, this implication can be  
71 tested simply and rigorously with standard statistical tests for equal means and variances.

72 The brain's need for oscillations with the distribution of frequencies found in EEGs  
73 suggests a possible relationship between the oscillators proposed here and the abnormal electrical  
74 activity in neurological disorders such as epileptic seizures. This suggestion is summarized in  
75 the remainder of this introduction.

76 Oscillations in EEGs have a wide variety of frequencies, including high frequencies.  
77 From an engineering standpoint, connecting logic gates to produce oscillations with such a  
78 variety of frequencies is not a straightforward design problem. A toggle is a flip-flop with one  
79 input that inverts the state with each input pulse. Toggles connected in sequence are ideal for  
80 generating oscillations with a wide variety of frequencies because of the exponential growth in  
81 periods (doubling with each successive toggle). A three-inverter ring oscillator is the fastest  
82 oscillator that can be constructed with logic gates, and the distribution of frequencies that three-  
83 neuron ring oscillators can produce closely matches the distribution of frequencies in the EEG  
84 gamma band. But driving cascaded toggles with the ring oscillator presents several problems.

85 The master-slave toggle is the standard choice for cascaded toggles because a long input  
86 pulse inverts the toggle only once. A master-slave toggle can be constructed with neurons. But

87 a three-neuron ring oscillator's pulse duration is too short, and the oscillation frequency is too  
88 high, to invert a master-slave toggle correctly.

89 A JK flip-flop can be configured as a toggle, but it has a narrow range for an input pulse  
90 duration that can successfully invert it. The range is approximately three to four neuron delay  
91 times. Fortuitously, a three-neuron ring oscillator's pulse duration is just within the upper bound.

92 The JK toggle's output pulse duration is too long to invert another JK toggle correctly.  
93 Fortunately the toggle's two initial neurons produce output pulses of nearly the same duration as  
94 the toggle input. One of these signals can be used to invert the next toggle in the cascade. The  
95 master-slave would work for subsequent toggles in the cascade after the first one, but since the  
96 simpler JK suffices, there may have been no selective pressure to find the master-slave. There  
97 are other possibilities for toggles besides the JK design given here, but they would also have the  
98 problem of a narrow requirement for input pulse duration.

99 Irregularities such as variations in neuron delay times could cause serious errors in the JK  
100 toggle because of its narrow margin for error. For example, if the delay times of the neurons in a  
101 cascade's initial ring oscillator are substantially different from those in the cascade's first toggle,  
102 that could cause an error. Delay times can be stabilized by averaging the signals from several  
103 neurons and by other error-correcting mechanisms such as neuromodulators. But with such a  
104 narrow margin for error, such methods may not be foolproof. Depending on the type of error  
105 that occurs, neural structures that are synchronized by the oscillator would either be disabled or  
106 enabled but unsynchronized. The resulting timing errors in neural firing and the brain's efforts to  
107 deal with the errors could be related to the abnormal electrical activity characteristic of epileptic  
108 seizures.

109 The oscillator and JK toggle designs proposed here, as well as cascaded oscillators  
110 composed of JK toggles, are likely to be new to engineering.

## 111 **2. Materials and methods**

### 112 **2.1. Simulation materials and methods**

113 Simulations of electronic circuits were done in CircuitLab. A 5V signal represents the  
114 logic value TRUE, and 0V represents FALSE. The signal graphs are stacked for display by  
115 adding increments of 10V.

116 The neural oscillators and toggles were simulated in MS Excel. A neuron's state is its  
117 output signal strength, normalized for convenience to be in the interval [0, 1]. For the  
118 simulations, the number  $t_i$  represents the time after  $i$  changes of state ( $i = 0, 1, 2, \dots$ ). The time  
119 required for a neuron to change from one state to another is the neuron's delay time. The  
120 neurons' outputs are initialized at time  $t_0 = 0$ . For  $i > 0$ , the output of each neuron at time  $t_i$  is  
121 computed as a function of the inputs at time  $t_{i-1}$ . This function is given below. Baseline neuron  
122 activity and low level additive noise in neuron signals are simulated by a computer-generated  
123 random number uniformly distributed between 0 and 0.1.

124 Specific predicted probabilities of unusually high gamma band frequencies were  
125 approximated numerically from the estimated frequency probability density function (PDF) of  
126 the initial oscillator in the oscillator cascade with Converge 10.0, although this could also be  
127 done with a substitution of  $u = 1,000/x$  to convert the frequency PDF to a normal distribution of  
128 periods.

### 129 **2.2. Unexplained phenomena and alternative models**

#### 130 **2.2.1. Short-term memory: persistent firing or brief, coordinated bursts?**

131 Memory tests have shown that certain neurons fire continuously at a high frequency  
132 while information is held in short-term memory [7, 8]. These neurons exhibit seven

133 characteristics associated with memory formation, retention, retrieval, termination, and errors.  
134 One of the neurons in the NFFs proposed in [4] was shown to produce all of the characteristics.

135 In addition to neurons firing persistently, other neurons firing in brief, coordinated bursts  
136 are also associated with short-term memory [5]. Which of these two phenomena actually  
137 produces short-term memory has been a longstanding controversy [5, 6]. It will be shown that  
138 neural oscillators and NFFs together suggest a resolution to this issue.

## 139 **2.2.2. Electroencephalography**

### 140 **2.2.2.1. EEG phenomena and previous models**

141 Electroencephalograms show widespread rhythms that consist of many neurons firing  
142 with matched periods. The spectrum of frequencies has been partitioned into bands according to  
143 the behavioral and mental state associated with the frequencies in each band. Five EEG  
144 frequency bands are considered here: gamma, beta, alpha, theta, and delta. Some researchers  
145 have found more bands or divided the bands into sub-bands depending on the focus of their  
146 research, but these five are discussed most often in the literature.

147 The distribution of frequencies within each of these bands is unimodal [9-12]. The ratios  
148 of consecutive band boundaries [13] and the ratios of consecutive band peak frequencies [9-12]  
149 are approximately 2. The gamma band peaks at about 40 Hz [9-12], although it contains  
150 frequencies of 100 Hz or more [14, 15]. Several estimated frequencies have been found for each  
151 boundary between bands.

152 The EEG phenomena raise several questions. What produces the widespread,  
153 synchronized, periodic firing? What is the function of this widespread synchronization? What  
154 produces and what is the function of the wide distribution of EEG frequencies in bands? What  
155 produces the unimodal distribution in each band and the octave relationships between the peaks  
156 and boundaries? What determines the specific frequencies of the peaks and boundaries? Why



157 do gamma oscillations peak at about 40 Hz? Why does the gamma band contain frequencies that  
158 are considerably faster than 40 Hz? Why is there little agreement on the boundaries separating  
159 the EEG bands?

160 It will be shown that the cascaded oscillators model provides answers to all of the  
161 questions above.

162 Many models have been proposed for producing EEG frequencies [e.g., 16-23]. These  
163 models have several significant differences from the cascaded oscillators model. The models are  
164 far more complex than the cascaded oscillators' minimal architecture (three or six neurons per  
165 oscillator) and neuron requirements (minimal capabilities of excitation and inhibition). The  
166 models are not explicit in the sense of showing all neurons and connections. Each model focuses  
167 on a narrow aspect of EEGs, such as how some frequencies can be generated in one or two  
168 frequency bands. The models do not produce any of the known characteristics of the distribution  
169 of EEG frequencies, such as the octave relationships between the bands or the specific band  
170 peaks or boundaries. The models also do not show that EEG phenomena can arise from selective  
171 pressures for a biologically useful function. None of the models can answer more than one or  
172 two of the questions above. And none has a micro-level explanation for its results like the mean  
173 and variance of neuron delay times that determine the entire distribution of frequencies produced  
174 by cascaded oscillators.

#### 175 **2.2.2.2. Implausibility of alternative mechanisms**

176 The cascaded oscillators design is based on evolutionary selective pressure for the  
177 biologically useful function of synchronization of neural structures' state changes to avoid timing  
178 errors. This includes two specific selective pressures: for some types of information to be  
179 processed as fast as possible, and for a wide variety of speeds for diverse brain functions in the  
180 tradeoff between speed and accuracy. The first can be met by a three-inverter ring oscillator, the

181 fastest oscillator that can be achieved by a network of logic gates. The second can be met by  
182 cascaded toggles, which double the period with each toggle.

183 Conceivably, the biological need for fast oscillations could be met by a mechanism that is  
184 different from a three-neuron ring oscillator, and a wide variety of speeds could be achieved by  
185 something other than cascaded toggles. But according to the available data for neuron delay  
186 times and EEG frequencies, the distribution of EEG gamma frequencies matches that of three-  
187 neuron ring oscillators. Also according to available data for EEG frequencies, the distributions  
188 of the other EEG bands halve the frequencies with each band. These two EEG features are by-  
189 products of a possible simple solution to selective pressures, but otherwise they have no apparent  
190 biological function. This makes it implausible that EEG phenomena are produced by a  
191 mechanism that is fundamentally different from cascaded oscillators.

## 192 **2.3. Analysis**

### 193 **2.3.1. Neuron signals**

#### 194 **2.3.1.1. Neuron signal strength**

195 Neuron signal strength is normalized here by dividing it by the maximum possible  
196 strength for the given level of adaptation. This puts intensities in the interval from 0 to 1, with 0  
197 meaning no signal and 1 meaning the maximum strength. The normalized number is called the  
198 *response strength* or simply the *response* of the neuron. The responses 1 and 0 are collectively  
199 referred to as binary signals and separately as high and low signals.

200 The strength of a signal consisting of action potentials, or spikes, is measured by spike  
201 frequency. A high signal consists of a burst of spikes at the maximum spiking rate. For a signal  
202 that oscillates between high and low, the frequency of the oscillation is the frequency of bursts  
203 (not to be confused with the frequency of spikes).

204 Normalization is only for convenience. Non-normalized signal strengths, with the  
205 highest and lowest values labeled Max and Min, rather than 1 and 0, would do as well. Absolute  
206 maximum and minimum values are also not necessary for high and low. These could be  
207 replaced by high and low ranges of values.

208 Table 1 shows a truth table for the logic function X AND NOT Y. The last column also  
209 represents the approximate response of a neuron with high and low excitatory and inhibitory  
210 inputs X and Y, respectively. Of the 16 possible binary functions of two variables, this table  
211 represents the only one that is consistent with the customary meanings of "excitation" and  
212 "inhibition." In simplest terms, a neuron is active when it has excitatory input *and* does *not* have  
213 inhibitory input.

214

| X | Y | X AND NOT Y |
|---|---|-------------|
| 0 | 0 | 0           |
| 0 | 1 | 0           |
| 1 | 0 | 1           |
| 1 | 1 | 0           |

215

216 **Table 1. AND-NOT logic function.** The table is a logic truth table for the statement X AND  
217 NOT Y. It also shows the approximate response of a neuron with one excitatory input of  
218 strength X and one inhibitory input of strength Y.

219 Some of the networks presented here require continuous, high input. In the figures, this  
220 input is represented by the logic value "TRUE." For an electronic logic circuit, the high input is  
221 normally provided by the power supply. If the components represent neurons, the high input can  
222 be achieved by neurons in at least four ways. 1) A continuously high signal could be provided  
223 by a neuron that has excitatory inputs from many neurons that fire independently [24]. The brain  
224 has many neurons that are active spontaneously and continuously without excitatory input  
225 [25, 26]. A network neuron that requires a high excitatory input could receive it from 2) a

226 spontaneously active neuron, or 3) the neuron itself could be spontaneously active. 4) The high  
227 input could be provided by one of an NFF's outputs that is continuously high (or nearly high).

### 228 **2.3.1.2. Additive noise in neuron signals**

#### 229 **2.3.1.2.1. Noise reduction**

230 A sigmoid response to excitatory input produces an output that is closer to binary than the  
231 input by decreasing an input near 0 and increasing an input near 1. Some neurons are known to  
232 have sigmoid responses to single inputs, including inhibitory inputs [27-29]. It will be  
233 demonstrated by simulation that a neuron response that is sigmoid in both excitatory and  
234 inhibitory inputs is sufficient to produce robust near-binary outputs of the NFFs and oscillators  
235 presented here. But a sigmoid response is not necessary; a simpler, more general property is  
236 sufficient.

237 Reduction of noise in both excitatory and inhibitory inputs can be achieved by a response  
238 function that generalizes a sigmoid function's features. The noise reduction need only be slight  
239 for the proposed NFFs and oscillators because they have feedback loops that continuously reduce  
240 the effect of noise.

241 Let  $F(X, Y)$  represent a neuron's response to an excitatory input with strength  $X$  and an  
242 inhibitory input with strength  $Y$ . The function value, as well as  $X$  and  $Y$ , must be bounded by 0  
243 and 1, the normalized minimum and maximum possible neuron responses. Suppose  $F$  satisfies:

- 244 1.  $F(X, Y) > X - Y$  or  $F(X, Y) = 1$  for inputs  $(X, Y)$  near  $(1, 0)$  and
- 245 2.  $F(X, Y) < X - Y$  or  $F(X, Y) = 0$  for inputs  $(X, Y)$  near the other three vertices of the  
246 unit square.

247 The truth values of the logic function  $X$  AND NOT  $Y$  in Table 1 are  $\max\{0, X-Y\}$  (the  
248 largest of 0 and  $X-Y$ ). For inputs  $X$  and  $Y$  that are somewhat close to binary, conditions 1 and 2

249 make the neuron's response  $F(X, Y)$  closer to, or equal to, the binary truth value  $X \text{ AND NOT } Y$   
250 of Table 1 than  $\max\{0, X-Y\}$ . Neurons that make up the networks proposed here are assumed to  
251 have these two minimal noise-reducing properties.

252         There are many examples of functions that satisfy conditions 1 and 2. A sigmoid neuron  
253 response to excitatory input with no inhibitory input satisfies the conditions. The simple  
254 "threshold" response function of a neuron that has no response for low inputs, and fires at a high  
255 rate when the excitatory input strength is above a certain threshold value, is an extreme form of a  
256 sigmoid response and satisfies the conditions. A function that is sigmoid in both excitatory and  
257 inhibitory inputs (e.g., the function in the next section) satisfies the conditions. Also shown  
258 below is a single transistor with two inputs that satisfies the conditions. Conditions 1 and 2 are  
259 also consistent with more complex models. For example, each of the two inputs  $X$  and  $Y$  could  
260 represent nonlinear weighted sums (or even more complex functions) of several excitatory and  
261 inhibitory inputs, respectively, and  $F$  could be a nonlinear weighted sum of  $X$  and  $Y$ .

262         Conditions 1 and 2 are sufficient to reduce additive noise in binary inputs and produce  
263 the NFF results found here. The level of noise that can be tolerated by the NFFs depends on the  
264 two regions in the unit square where condition 1 or 2 holds for the input point  $(X, Y)$ . If a binary  
265 input  $(X, Y)$  has additive noise that is large enough to change the region in which it lies, an error  
266 can occur. Because of the continuous feedback in NFFs, it will be seen that even a response  
267 function with only a moderate noise-reducing capability can maintain near-binary outputs with  
268 substantial noise in the inputs.

#### 269 **2.3.1.2.2. Example of a neuron response that satisfies conditions 1 and 2**

270         For any sigmoid function  $f$  from  $f(0) = 0$  to  $f(1) = 1$ , the following function has the noise-  
271 reducing properties 1 and 2:

272          $F(X, Y) = f(X) - f(Y)$ , bounded below by 0.

273 This function is plausible as an approximation of a neuron response because it is sigmoid  
274 in each variable and some neurons are known to have sigmoid responses to single excitatory or  
275 inhibitory inputs, as mentioned above. The same sigmoid function applied to X and Y is not  
276 necessary to satisfy conditions 1 and 2. The function F could be the difference of two different  
277 sigmoid functions.

278 The function F is illustrated in Fig 1 for a specific sigmoid function f. The sine function  
279 of Fig 1A, which is somewhat close to the line  $y = x$ , was chosen for f rather than any of the  
280 more common examples of sigmoid functions to demonstrate by simulation that a highly  
281 nonlinear function is not necessary for robust maintenance of binary signals. On half of the unit  
282 square, where  $Y \geq X$ , Fig 1B shows that F has the value 0. This reflects the property that a large  
283 inhibitory input generally suppresses a smaller excitatory input.  
284

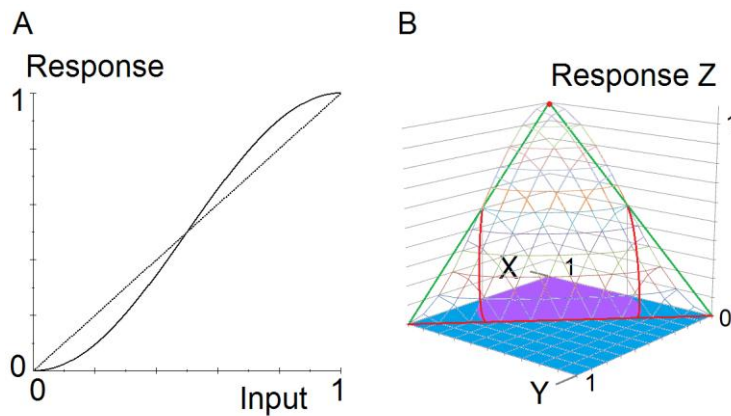

285

286 **Fig 1. Noise-reducing function.** The graphs show an example of a neuron response to analog  
287 inputs that reduces additive noise in binary inputs. **A.** A sigmoid function  $f(x) =$   
288  $(1/2)\sin(\pi(x - 1/2)) + 1/2$ . **B.** Graph of  $F(X, Y) = f(X) - f(Y)$ , bounded by 0. The response  
289 function has the noise-reducing properties 1 and 2. Wireframe: Graph of the function  $Z = F(X,$   
290  $Y)$ . Green and red lines: A triangle in the plane  $Z = X - Y$ . Red: Approximate intersection of the  
291 plane and the graph of F. Purple: Approximate region in the unit square where  $F(X, Y) > X - Y$

292 or  $F(X, Y) = 1$  (condition 1). Blue: Approximate region in the unit square where  $F(X, Y) < X -$   
293  $Y$  or  $F(X, Y) = 0$  (condition 2).

### 294 **2.3.1.2.3. Neuron response for simulations**

295 The response function  $F(X, Y)$  in Fig 1 is used for the simulations as follows. The  
296 number  $t_i$  represents the time after  $i$  changes of state. The increment  $t_i - t_{i-1}$  is the delay time of  
297 the neuron that changed states. The neurons' outputs are initialized at time  $t_0 = 0$ . At time  $t_i$  for  $i$   
298  $> 0$ , the output  $Z_i$  of each neuron that has excitatory and inhibitory inputs  $X_{i-1}$  and  $Y_{i-1}$  at time  $t_{i-1}$   
299 is:

$$300 \quad 3. \quad Z_i = F(X_{i-1}, Y_{i-1}), = \max\{0, f(X_{i-1}) - f(Y_{i-1})\}$$
$$301 \quad = \max\{0, [(1/2)\sin(\pi(X_{i-1} - 1/2)) + 1/2] - [(1/2)\sin(\pi(Y_{i-1} - 1/2)) + 1/2]\}.$$

### 302 **2.3.1.2.4. A primitive noise-reducing gate**

303 Properties 1 and 2 do not indicate sophisticated capabilities of mathematics or logic. A  
304 response with the properties can be produced by mechanisms that are quite simple. Fig 2 shows  
305 that a single transistor and three resistors can be configured to accomplish this. The inputs  $X$  and  
306  $Y$  vary from 0V to 5V in steps of 0.05V.  
307

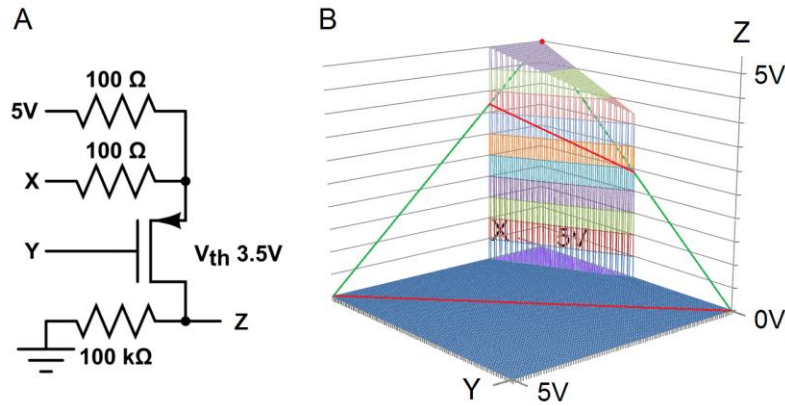

309 **Fig 2. Single transistor gate that reduces noise.** This minimal logic circuit satisfies the noise-  
310 reducing conditions 1 and 2. **A.** A logic circuit consisting of one transistor and three resistors.  
311 **B.** CircuitLab simulation of the logic circuit in A. Wireframe: Graph of the transistor response  
312 function  $Z = F(X, Y)$ . Three green and red lines: A triangle in the plane  $Z = X - Y$ . Red:  
313 Intersection of the plane and the graph of  $F$ . Purple: Region in the unit square where  $F(X, Y) >$   
314  $X - Y$  or  $F(X, Y) = 1$  (condition 1). Blue: Region in the unit square where  $F(X, Y) <$   
315  $X - Y$  or  $F(X, Y) = 0$  (condition 2).

### 316 2.3.2. Neural logic gates and flip-flops

317 For several reasons that were detailed in [4], the neural networks in the figures are  
318 illustrated with standard (ANSI/IEEE) logic symbols rather than symbols commonly used in  
319 neuroscience schematic diagrams. One of the reasons is that the symbols can be interpreted in  
320 two ways. As a logic symbol, the rectangle with one rounded side in Fig 3A represents the AND  
321 logic function, and the circle represents negation. The input variables  $X$  and  $Y$  represent truth  
322 values TRUE or FALSE, and the output represents the truth value  $X$  AND NOT  $Y$ . Second, Fig  
323 3A can also represent a single neuron, with a circle representing inhibitory input and no circle  
324 representing excitatory input. With the minimal noise-reducing capabilities of conditions 1 and  
325 2, if  $X$  and  $Y$  are binary with some additive noise, the output will be closer to, or equal to, the  
326 binary  $X$  AND NOT  $Y$  value of Table 1 than  $\max\{0, X - Y\}$ .



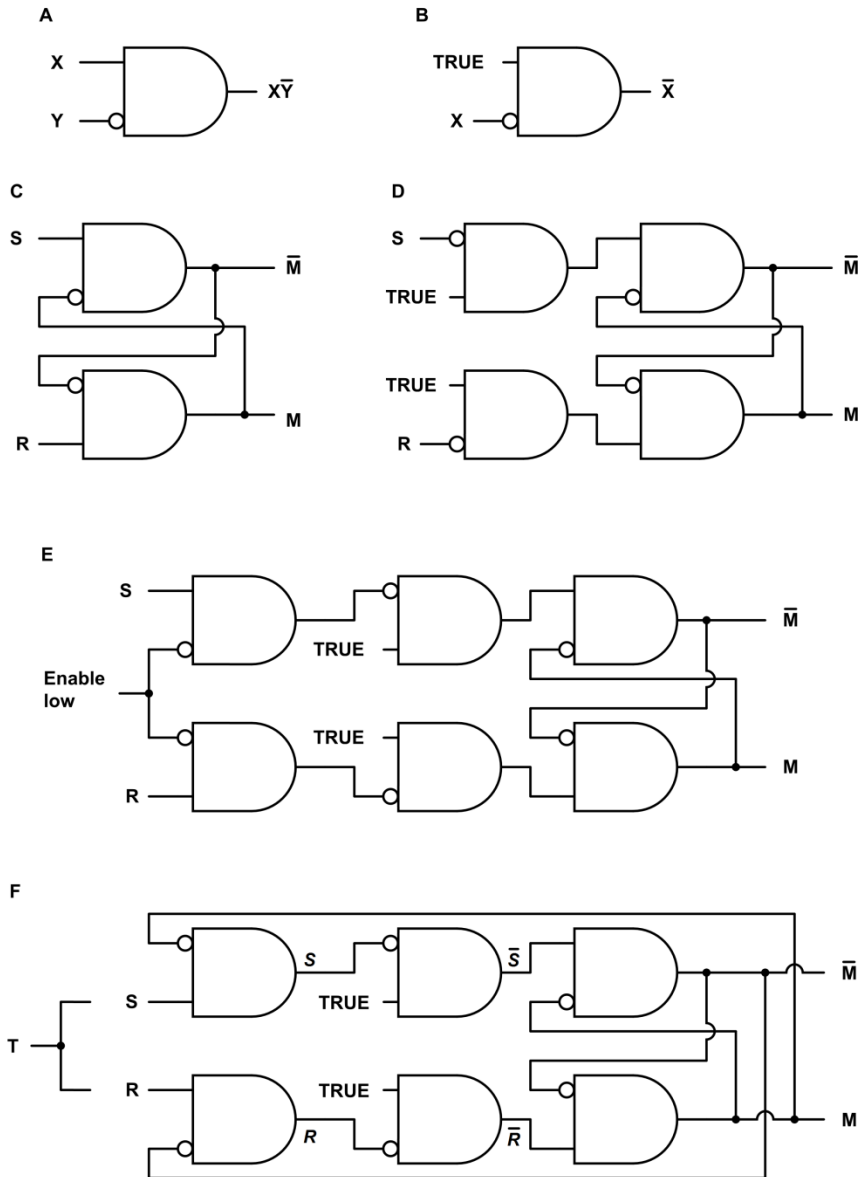

327

328 **Fig 3. Neural logic gates and flip-flops.** **A.** A symbol for an AND-NOT logic gate, with output  
 329 X AND NOT Y. The symbol can also represent a neuron with one excitatory input and one  
 330 inhibitory input. **B.** An AND-NOT gate configured as a NOT gate, or inverter. **C.** An active low  
 331 Set-Reset (SR) flip-flop. **D.** An active high SR flip-flop. **E.** An active high SR flip-flop enabled  
 332 by input from an oscillator. **F.** A JK flip-flop or toggle.

333 As logic circuits, the rest of the figures' outputs shown in Fig 3 follow from Boolean  
334 logic. The figures' outputs as networks composed of neurons will be illustrated as needed by  
335 simulation. Fig 3B shows an AND-NOT gate with a continuously high input that functions as a  
336 NOT gate, or inverter.

337 A flip-flop stores a discrete bit of information in an output with values usually labeled 0  
338 and 1. This output variable is labeled M in Fig 3. The value of M is the flip-flop *state* or *memory*  
339 *bit*. The information is stored by means of a brief input signal that activates or inactivates the  
340 memory bit. Input S *sets* the state to  $M = 1$ , and R *resets* it to  $M = 0$ . Continuous feedback  
341 maintains a stable state. A change in the state *inverts* the state.

342 Two basic types of flip-flops are the Set-Reset (SR) and JK. Fig 3C shows an active low  
343 SR flip-flop. The S and R inputs are normally high. A brief low input S sets the memory bit M  
344 to 1, and a brief low input R resets it to 0. Adding inverters to the inputs in Fig 3C produces the  
345 active high SR flip-flop of Fig 3D. The S and R inputs are normally low. A brief high input S  
346 sets the memory bit M to 1, and a brief high input R resets it to 0. A disadvantage of the SR flip-  
347 flop is that if S and R input signals are attempting to invert the flip-flop simultaneously, the  
348 outputs are unpredictable.

349 Fig 3E shows a flip-flop with an enabling input. The S and R inputs in Fig 3D have been  
350 replaced by AND-NOT gates that allow the S or R input to be transmitted only when the  
351 enabling input is low. In synchronized signaling systems, several logic circuits are enabled by an  
352 oscillator signal to avoid timing errors. Structures that are enabled by the same signal change  
353 states simultaneously. Adding an inverter (Fig 3B) to the enabling signal can ensure that one  
354 structure does not change states simultaneously with another.

355 For the so-called JK flip-flop in Fig 3F, the enabling input in Fig 3E has been replaced by  
356 input from the flip-flop outputs. The advantage of the JK flip-flop over the SR flip-flop is that if  
357 S and R are both high simultaneously, the flip-flop state is inverted because one of the two input

358 gates is inhibited by one of the flip-flop outputs. This means the JK flip-flop can be configured  
359 as a toggle by linking the Set and Reset inputs, as illustrated by the single input T in the figure.

360 A problem with the JK toggle is that it functions correctly only for a short duration of  
361 high input. If the input pulse is too long or too short, an error occurs. This problem is discussed  
362 in the toggle section below.

### 363 2.3.3. Neural toggles and oscillators

#### 364 2.3.3.1. Neural toggle

365 Fig 4 shows a simulation of the JK flip-flop of Fig 3F composed of neurons and  
366 configured as a toggle. The outputs were initialized in a stable state, and the simulation was  
367 carried out as described in the simulation methods with equation 3. The slow rise and fall of the  
368 toggle input T, over several state changes, is exaggerated to clarify the robust operation of the  
369 network in the presence of additive noise.

370

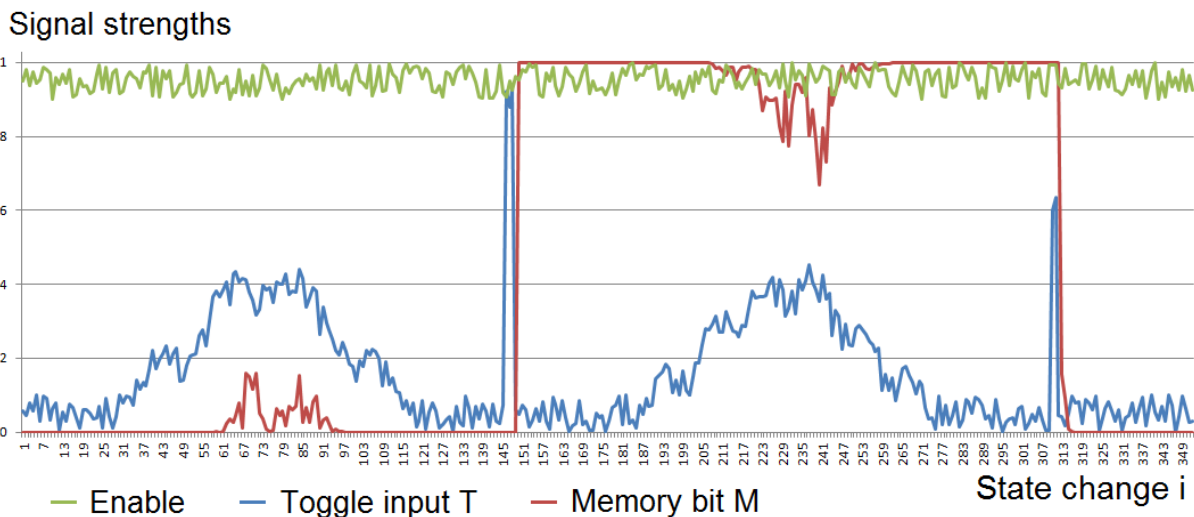

372 **Fig 4. Simulation of a neural toggle with noise in the inputs.** The figure shows a simulation  
373 of the JK flip-flop in Fig 3F composed of six neurons and configured as a toggle. The input  
374 TRUE in Fig 3F is labeled Enable here because it contains additive noise. The graphs show the

375 toggle's operation is robust in maintaining a nearly binary memory bit in the presence of  
376 substantial additive noise in the inputs. Baseline noise in both the Enable input and the toggle  
377 input T has negligible effect on the memory bit M. Two temporary bursts of larger noise in T  
378 have no lasting effect. The two inputs that invert the toggle state have strengths  $0.85 + \text{noise}$  and  
379  $0.55 + \text{noise}$ , with durations of four and three state changes, respectively. The values 0.85 and  
380 0.55 were chosen to show that high inputs substantially reduced by noise as well as high inputs  
381 successfully invert the toggle.

382         Low level additive noise and baseline activity in the inputs in Fig 4 are simulated by a  
383 computer-generated random number uniformly distributed between 0 and 0.1. The high  
384 Enabling input is simulated by 1 minus noise. Each of the two temporary bursts of larger noise  
385 in T is simulated by the sum of two sine functions and the computer-generated noise.

386         The JK toggle is sensitive to the duration of the high input pulse T. The simulations in  
387 Fig 5 illustrate the limitations on the input pulse durations. The simulations were carried out as  
388 described in the simulation methods with equation 3.

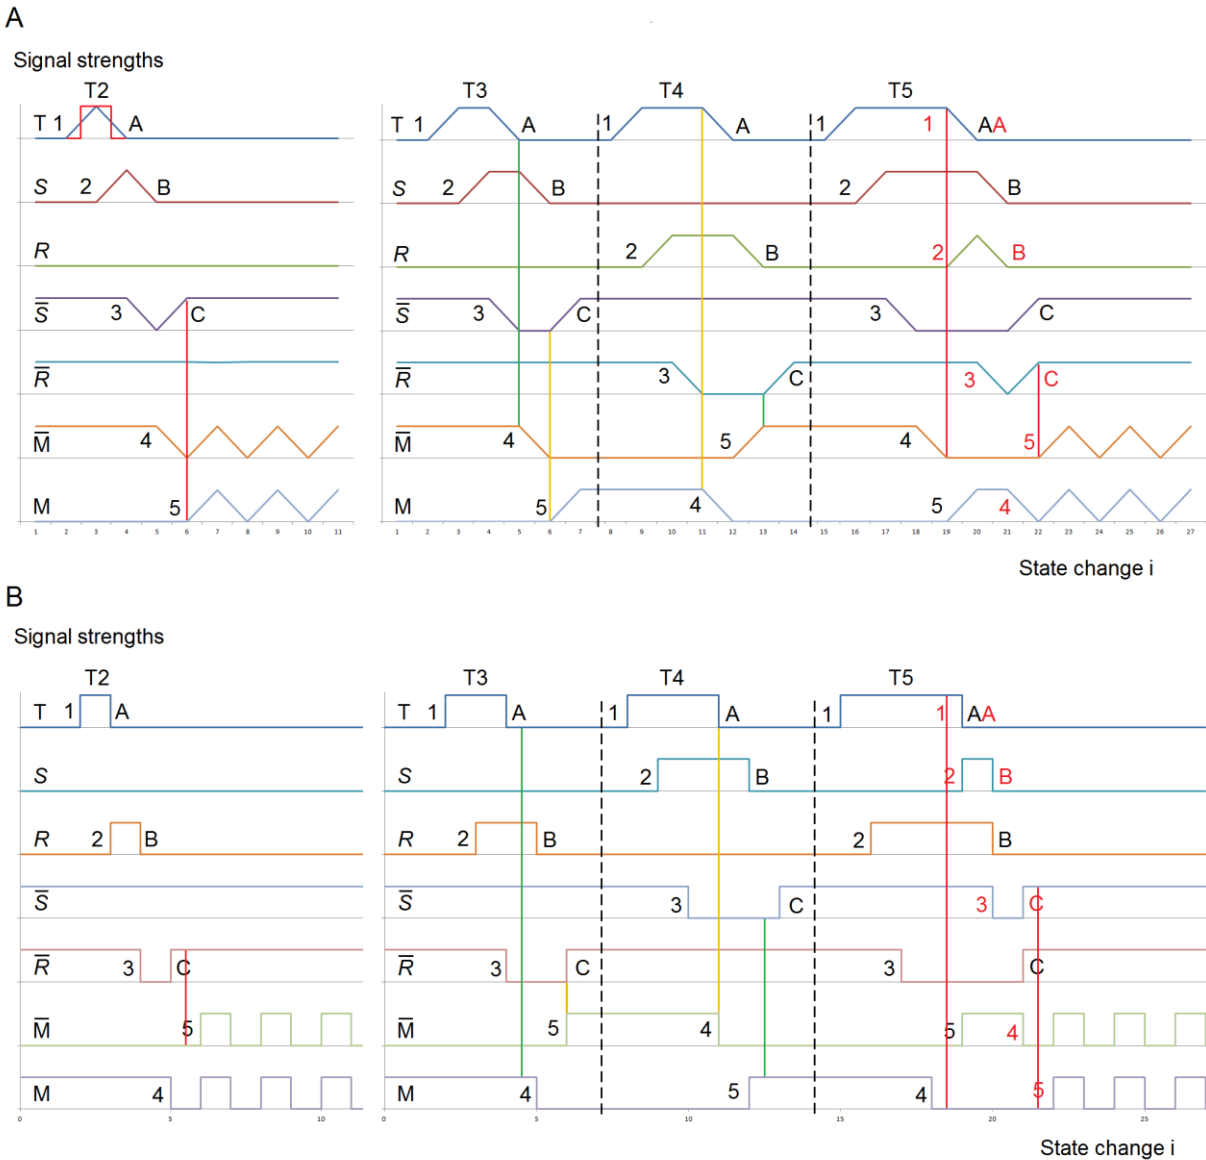

389

390 **Fig 5. Neural toggle simulations illustrating the narrow requirement for input pulse**  
 391 **duration.** The graphs show the simulated responses of a neuron implementation of the JK  
 392 toggle in Fig 3F, with high input pulses T that last for two to five neuron changes of state. These  
 393 pulse durations include the pulse's rise and fall. The piecewise linear (PWL) graphs in  
 394 simulation **A** and piecewise square (PWS) graphs in simulation **B** indicate rise and fall that are  
 395 spread uniformly over the change of state or that occur quickly, respectively. For comparison,  
 396 the PWS pulse T2 from Fig 5B is superimposed in red on the PWL T2 in Fig 5A. The results in

397 the two simulations are the same, except that wherever one illustrates a Set (*S*) inversion, the  
398 other shows a Reset (*R*).

399 A successful inversion of the toggle state requires the input *T* to be high long enough to  
400 invert the toggle, but not so long that it initiates a second toggle inversion. An input pulse that is  
401 too short or too long causes the inhibiting feedback from a toggle output to begin too late or to  
402 end too soon, respectively. For each high pulse of the toggle input *T*, the sequence of signal  
403 inversions numbered 1 through 5 in Fig 5 inverts the two toggle outputs. The sequence *A*, *B*, *C*  
404 terminates the toggle inversion.

405 If the input pulse *T* is too short, the terminating sequence *A-C* completes before the  
406 inverting sequence 1-5. That is, step *C* occurs before step 5, which means the inhibiting  
407 feedback to the low toggle output begins too late to prevent an extra inversion of that output.  
408 This error occurs for *T*<sub>2</sub> in Fig 5, highlighted with a red line. In Fig 5A for example, step 5  
409 makes *M* high, which is supposed to keep *M*<sub>bar</sub> inhibited in a low state. But because step *C*  
410 returned *S*<sub>bar</sub> to the high state before step 5 provides the inhibitory high input from *M*, *M*<sub>bar</sub>  
411 returns to the high state.

412 In the simulation, the toggle outputs *M* and *M*<sub>bar</sub> happen to go high simultaneously and  
413 they continue oscillating together in a race condition. As will be seen, real materials do not  
414 make such changes exactly simultaneously. One of the two outputs will soon win the race,  
415 stabilizing the outputs.

416 The too-short input error is only narrowly avoided in the case *T*<sub>3</sub>, where steps *C* and 5  
417 occur in the same change of state. The near error is highlighted with a yellow line. In case *T*<sub>4</sub>,  
418 step *C* occurs after step 5, highlighted with a green line.

419 If the input pulse *T* is too long, the high toggle output inverts too soon to inhibit the  
420 toggle input from initiating another toggle inversion. That is, step 4 occurs before step *A*. This

421 error occurs for T5 in Fig 5, highlighted with a red line. In Fig 5A for example, the toggle input  
422 T is still high when M\_bar has inverted to low and is no longer suppressing R. This begins  
423 another inversion of the toggle state, shown in red. As before for short inputs, step C occurs  
424 before step 5, resulting in the race condition.

425 The too-long input error is narrowly avoided in the case T4, where steps 4 and A occur in  
426 the same change of state. The near error is highlighted with a yellow line. In case T3, step 4  
427 occurs after step A, highlighted with a green line. Longer pulses in T simply invert the toggle  
428 twice, leaving the toggle state unchanged.

429 The next simulation may be more accurate in how real components actually function. Fig  
430 6 shows an electronic implementation of an AND-NOT gate and two simulations of the JK  
431 toggle of Fig 3F composed of these gates. The threshold for each transistor is 2V.

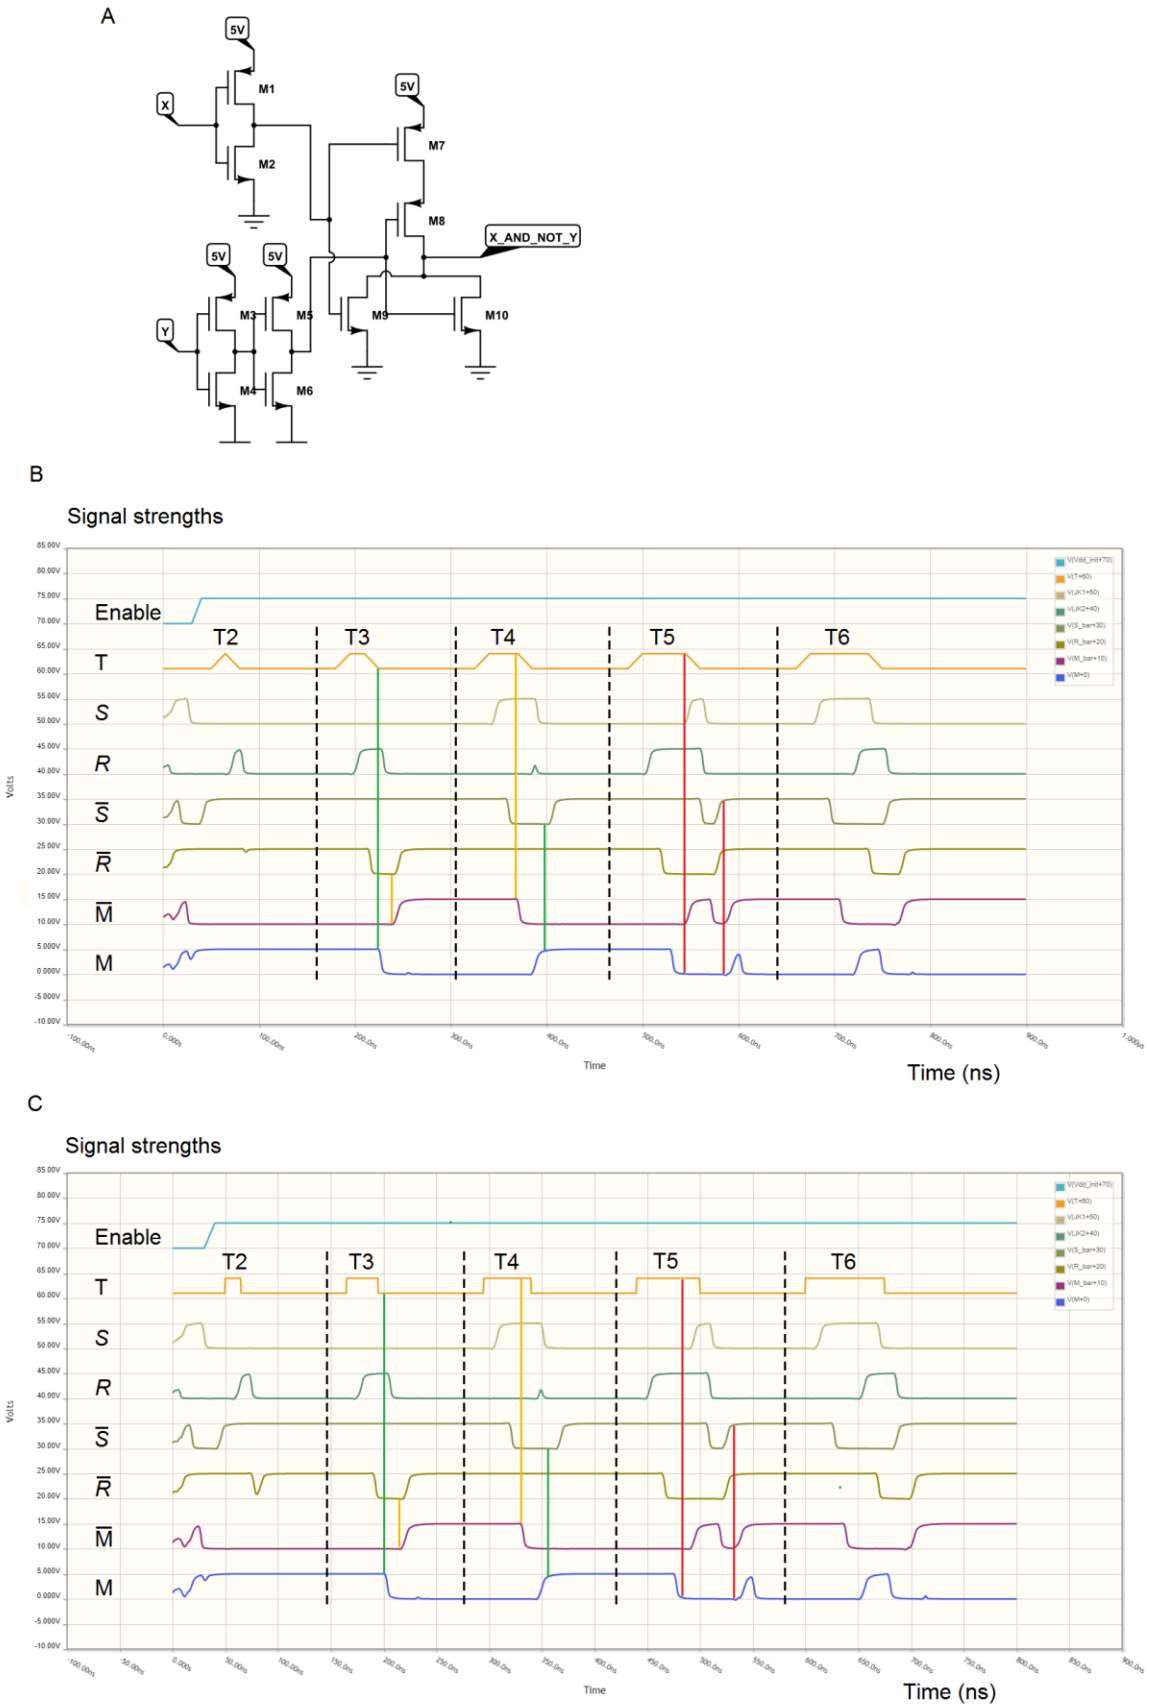



433 **Fig 6. An electronic simulation that verifies the narrow requirement for the JK toggle's**  
434 **input pulse duration. A.** A CMOS AND-NOT gate of Fig 3A composed of a NOR gate (NOT  
435 OR), an inverter for X, and a buffer for Y to even the timing of the inputs. By De Morgan's law,  
436 the output  $\text{NOT}[\text{NOT}(X) \text{ OR } Y] = X \text{ AND NOT } Y$ . **B.** A simulation of the JK toggle in Fig 3F  
437 composed of the AND-NOT gates in A with PWL inputs. The simulation time is 900 ns. **C.** A  
438 simulation of the toggle with PWS inputs. The simulation time is 800 ns.

439 The next electronic simulation will show that the delay time of the AND-NOT gate in Fig  
440 6A is about 15 ns. So the input pulse durations for T1-T5 in Figs 6B and 6C are multiples of 15  
441 ns. The electronic simulation software initializes the component states, so only one enabling  
442 input is needed for an asymmetry: the first 5V input to the first AND-NOT gate of the toggle.

443 Except for the race conditions and time scales, the simulations of the electronic toggle in  
444 Fig 6 show results that are similar to the simulations of the neural toggle in Fig 5. In Fig 6, the  
445 pulse T2 is simply too short to invert the toggle outputs. Pulses T3 and T4 invert the toggle  
446 outputs correctly. For the near error in T4, highlighted with yellow lines in Figs 6B and 6C, the  
447 pulse duration is long enough to produce a slight rise in  $R$ , the beginning of another toggle  
448 inversion. But the rise is too small to have a discernable effect on subsequent steps. Input T5  
449 successfully inverts the outputs, but the long input is enough to raise a brief pulse in  $S$ . This  
450 causes the toggle outputs to be briefly malformed. Input T6 is so long it inverts the toggle twice,  
451 ultimately leaving the outputs unchanged. Longer input pulses also invert the toggle outputs  
452 only twice. Fig 6C shows a somewhat greater response to the T2 input than Fig 6B, especially  
453 evident in  $R_{\text{bar}}$ , because the high portion in the PWS input pulse T2 is wider than in the PWL  
454 pulse. The change in  $R_{\text{bar}}$  is not enough to have a discernable effect on  $M$ .

455 The AND-NOT gate of Fig 6A was used for the simulations because of the highly  
456 reliable CMOS architecture. Although one-transistor AND-NOT gates like the one in Fig 2A  
457 can form functioning logic circuits [30, 31], the capability of electronic signals to travel both

458 ways between components can cause problems in circuits composed of such simple hardware.  
459 Neural synapses have the distinct advantage of conveying signals that are generally transmitted  
460 only one way. This signal difference is one of the reasons that CMOS architecture is used almost  
461 exclusively in electronic logic circuits, and the reason that the AND-NOT gate in Fig 6A requires  
462 10 transistors to accomplish what a single neuron can do.

463 The electronic simulations allow much more granular data than the neural simulations  
464 using equation 3, which evaluates only at the end of each state change. The simulation of Fig 6B  
465 was done with time steps of 1 ns, i.e., 15 evaluations for each state change. For Fig 6C, the time  
466 steps were 0.5 ns to simulate the PWS input more accurately.

#### 467 **2.3.3.2. Neural ring oscillator**

468 An oscillator produces periodic bursts of a high signal followed a quiescent period of a  
469 low signal. It is the basic element of a timing mechanism. A ring oscillator is a simple, reliable  
470 oscillator. An odd number of three or more inverters connected sequentially in a ring produces  
471 periodic bursts as each gate inverts the next one. The odd number of inverters makes all of the  
472 inverter states unstable, so the states oscillate between high and low. All inverters in the ring  
473 produce oscillations with the same frequency. Their phases are approximately uniformly  
474 distributed over one cycle, and the high and low signal durations are approximately equal. Their  
475 common period is twice the sum of the inverters' delay times. (The sum is doubled because each  
476 component inverts twice per cycle.) A ring oscillator is the simplest type of oscillator that can be  
477 implemented with logic gates, and the simplest and fastest ring oscillator consists of three  
478 inverters.

479 Fig 7 shows a three-inverter ring oscillator composed of AND-NOT gates and two  
480 simulations of the oscillator composed of three neurons. Enable 1 rises two state changes before  
481 Enable 2 to initialize the cells. Additive noise in the Enable inputs is simulated by a random  
482 number uniformly distributed between 0 and 0.1. The Enabling input begins as baseline noise

483 and transitions between 0 and 1 as a sine function plus noise. During the interval when the  
484 Enabling input is high, it is 1 minus noise.  
485

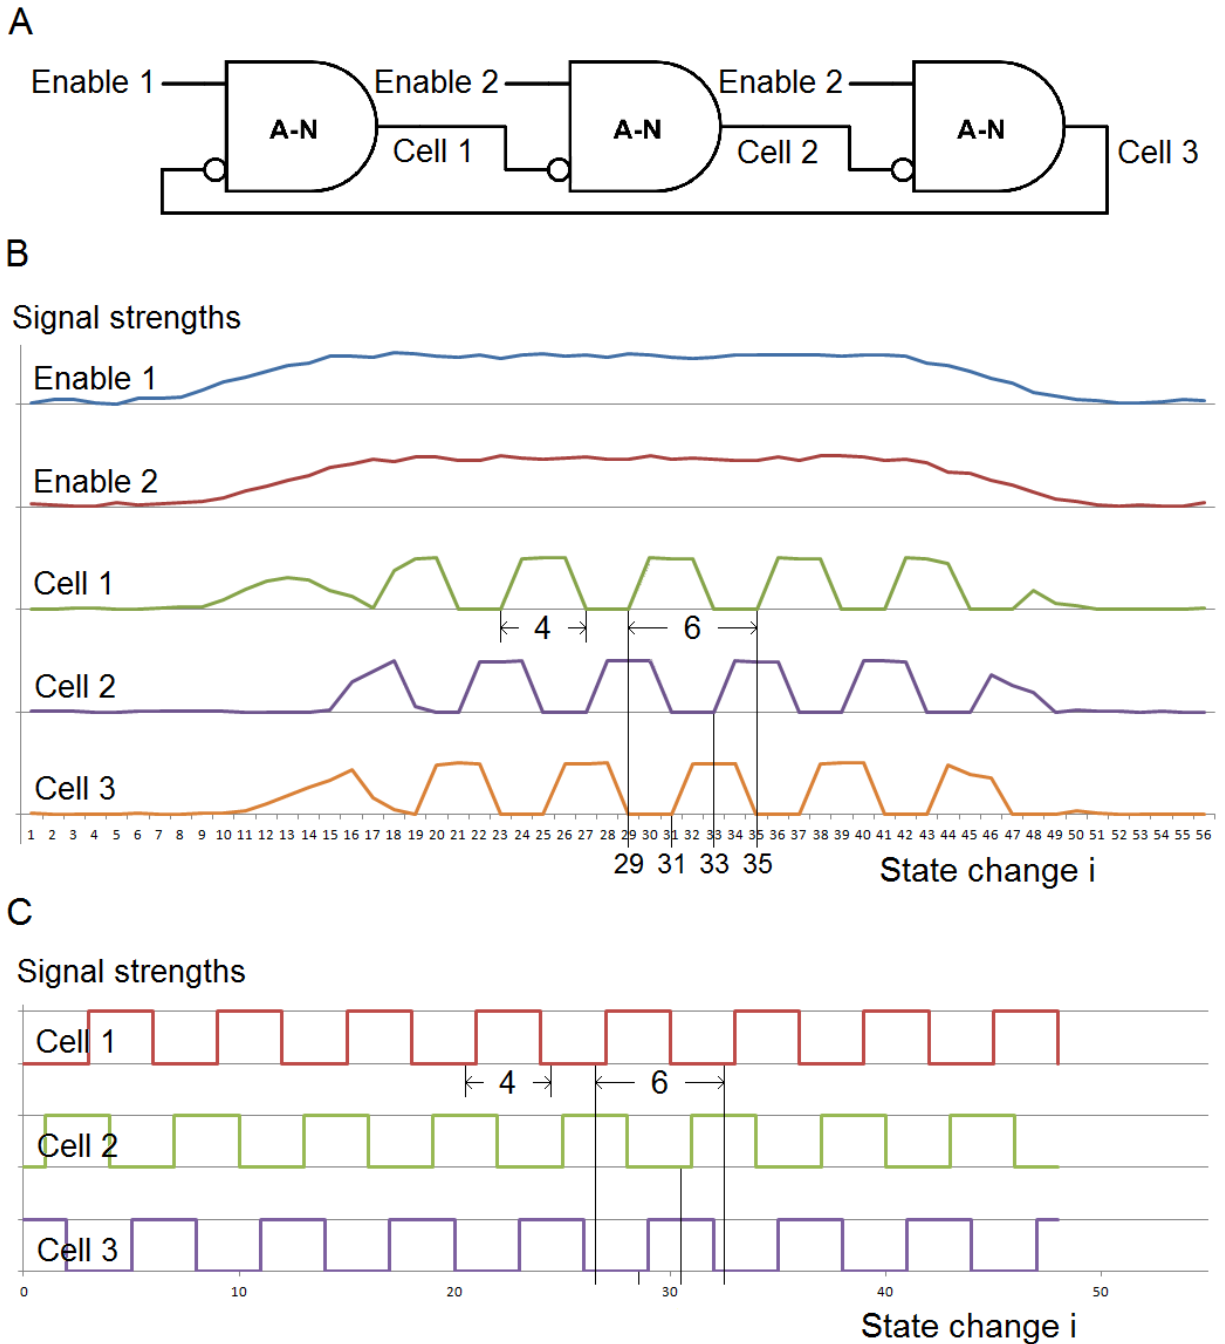

486

487 **Fig 7. Ring oscillator.** **A.** A ring oscillator consisting of three inverters of Fig 3B. **B.** A  
488 simulation of the ring oscillator composed of three PWL neurons. **C.** A simulation of the ring

489 oscillator composed of three PWS neurons. The common period of six changes of state is the  
490 sum of the neurons' delay times (two changes of state for each neuron). The phases are  
491 approximately uniformly distributed over the period, indicated by the black lines. The duration  
492 of each neuron's high burst is four changes of state. This is a burst duration that can successfully  
493 invert a JK toggle.

494 Fig 8 shows a simulation of an electronic implementation of the three-inverter oscillator  
495 for comparison with the neural implementation. The simulation time is 650 ns.  
496

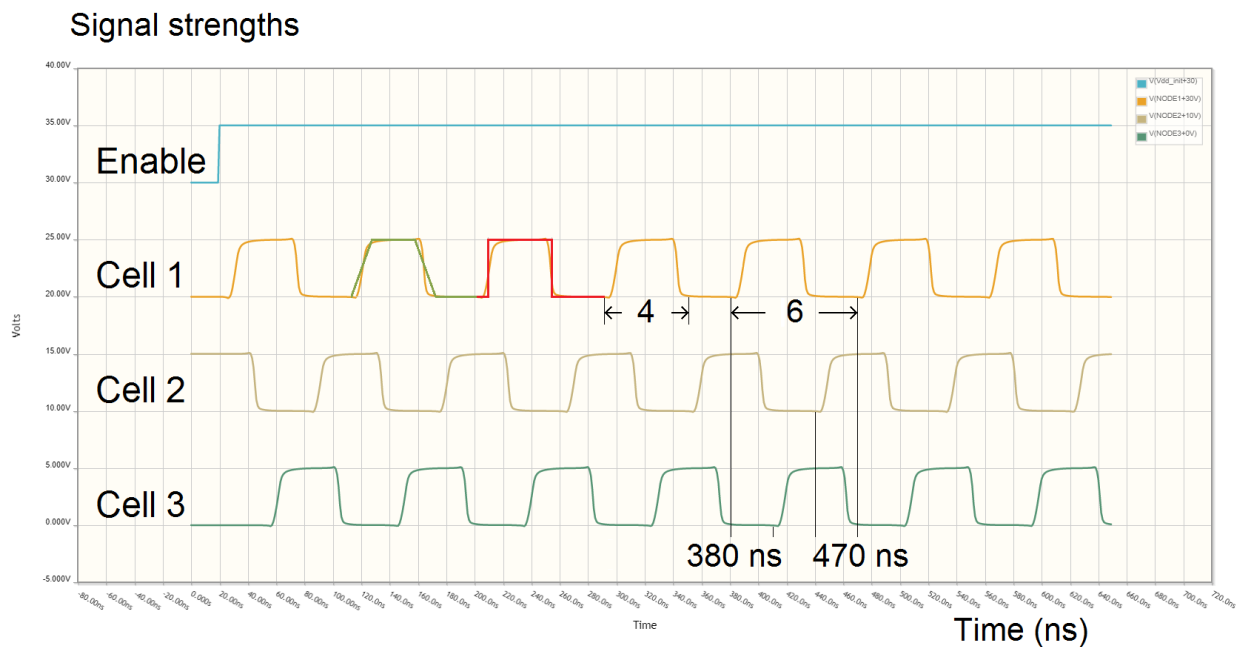

497

498 **Fig 8. Simulation of an electronic ring oscillator.** The graphs show a simulation of the  
499 oscillator in Fig 7A composed of AND-NOT gates in Fig 6A. Except for the time scale, the  
500 electronic simulation has essentially the same results as the neural simulations in Fig 7. One  
501 cycle of the PWL wave of Fig 7B and one cycle of the PWS wave of Fig 7C are superimposed  
502 for comparison. The slopes of the electronic oscillator's rise and fall lie between the two  
503 extremes of the simulated neural oscillators' PWL and PWS waves. The period of about 90 ns  
504 means the AND-NOT gate's simulated delay time is about 15 ns. The three phases are  
505 approximately uniformly distributed over one cycle, as indicated by the black lines.

506 **2.3.3.3. Cascaded neural oscillators**

507 As described in the introduction, an oscillator can be connected in sequence with toggles  
508 to form a cascade of oscillators. Because two high inputs are required for each cycle of a toggle-  
509 as-oscillator (one to set the memory state, another to reset it), a toggle produces a signal whose  
510 period is exactly double that of the toggle's input. Fig 9 shows a cascade consisting of a ring  
511 oscillator and two toggles.

512

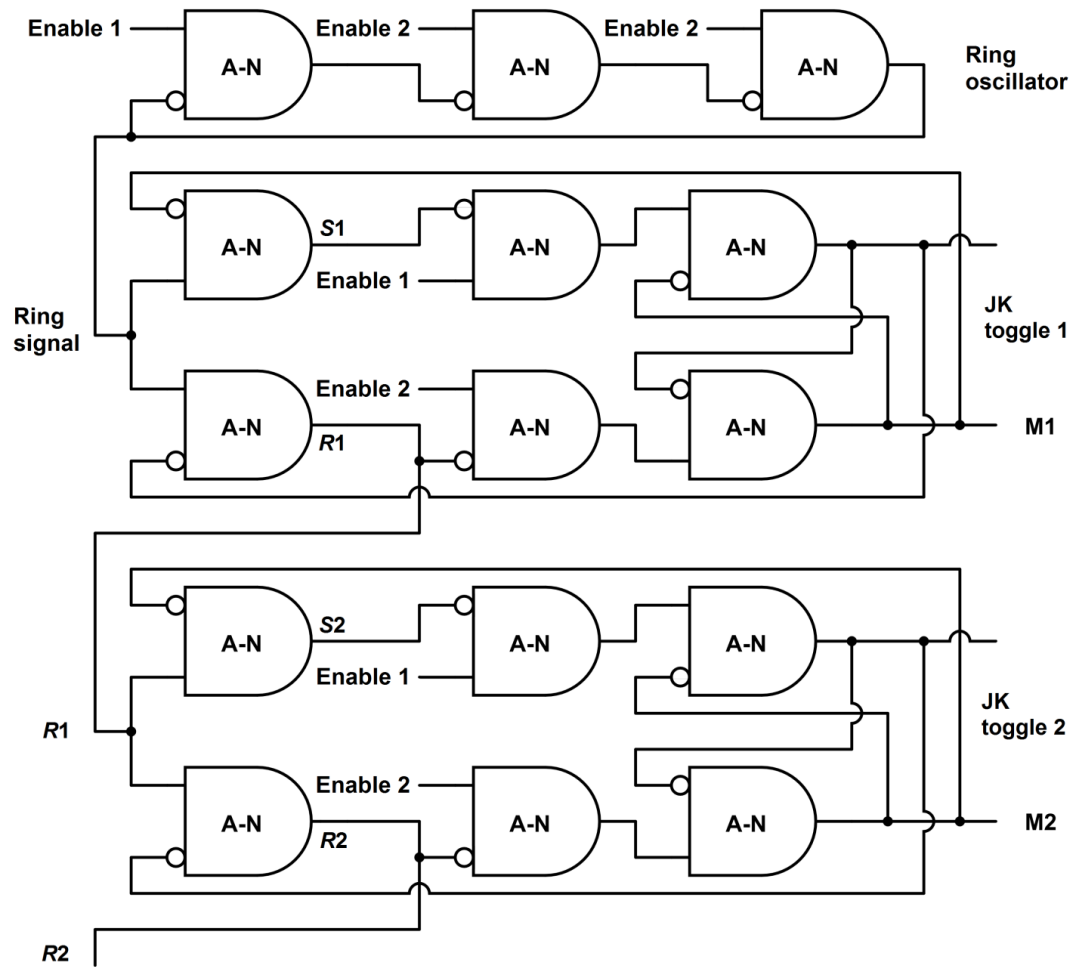

513

514 **Fig 9. Three cascaded neural oscillators.** The cascade consists of the ring oscillator of Fig 7A  
515 and two JK toggles of Fig 3F connected in sequence. A cascade could have any number of  
516 toggles. The input to the first toggle comes from the ring oscillator, and the input to each  
517 succeeding toggle comes from one of the first gates in the previous toggle. This makes the

518 duration of each toggle's high input pulse remain approximately the same throughout the  
519 cascade.

520 Simulations of the cascaded oscillators in Fig 9 are shown in Fig 10. Except for the time  
521 scales, the simulated neural results in Figs 10A and 10B are essentially the same as the simulated  
522 electronic results of Fig 10C.  
523

A

Signal strengths

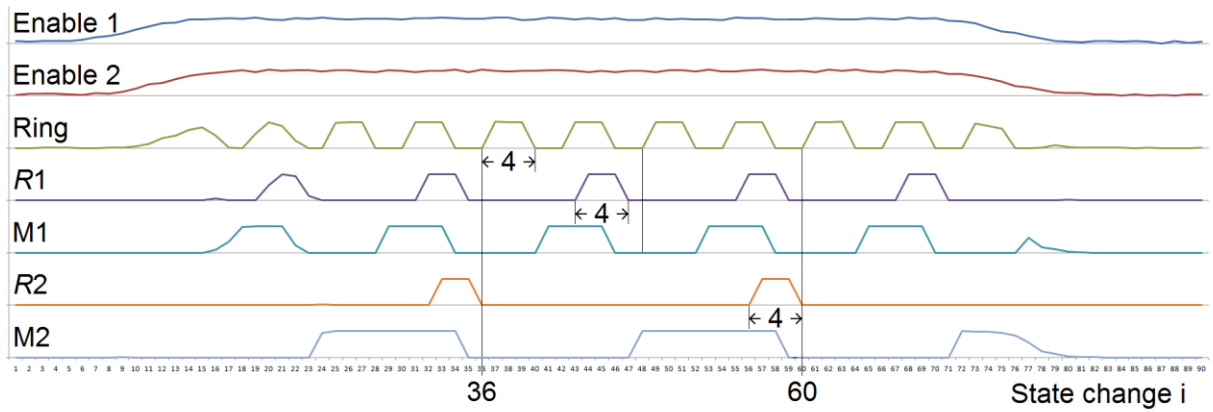

B

Signal strengths

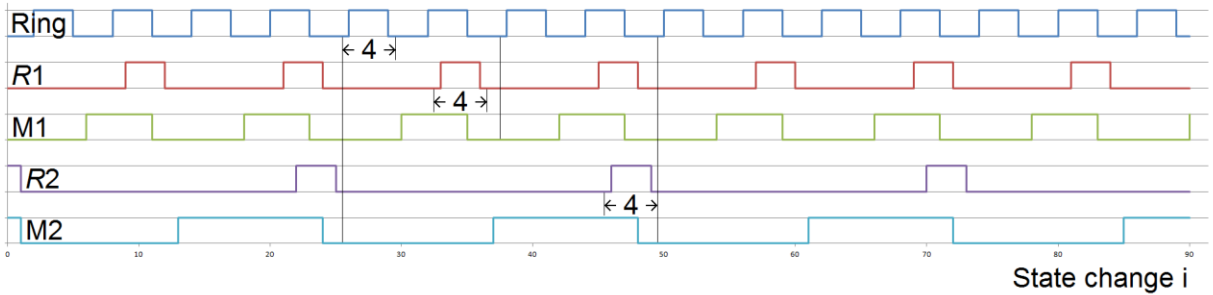

C

Signal strengths

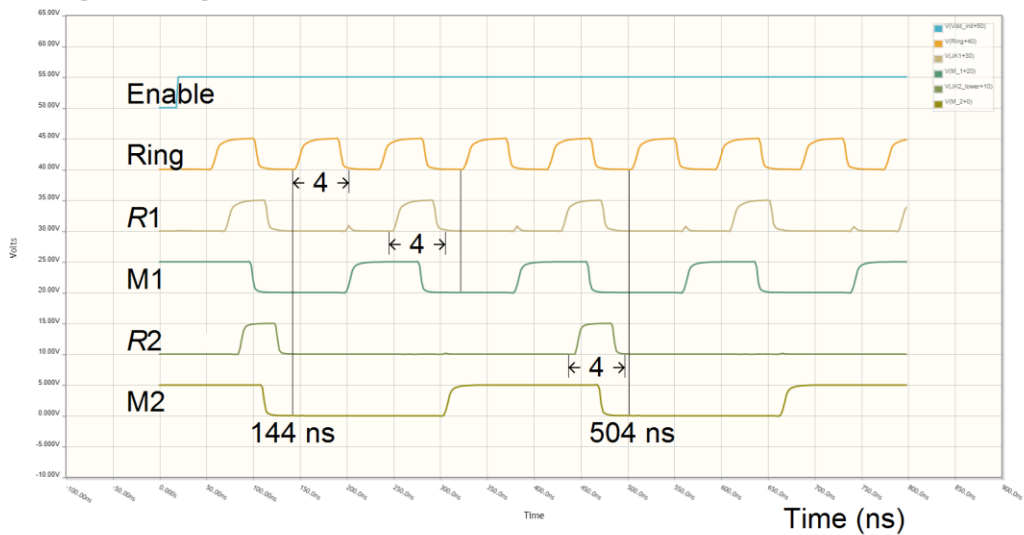

525 **Fig 10. Simulations of the three cascaded oscillators in Fig 9.** **A.** Simulation of oscillators  
526 composed of PWL neurons. **B.** Simulation of oscillators composed of PWS neurons. **C.**  
527 Simulation of oscillators composed of the electronic AND-NOT gates of Fig 6A. The simulation  
528 time is 800 ns.

529 The simulations in Fig 10 illustrate the main properties of cascaded oscillators: In each  
530 toggle, the period of every neuron's output is double the period of the toggle's input, as indicated  
531 by the black lines. The pulse duration of each toggle's two initial gates is approximately the  
532 same as the pulse duration of the toggle's input, as indicated by the measures of four changes of  
533 state. The duration of each toggle's output pulse is approximately half of the period.

534 Because the input Ring to the first toggle has a pulse duration of four AND-NOT gate  
535 state changes, signal *R1* in Fig 10C has a small rise in each cycle similar to the rise in *R* for input  
536 *T4* in Fig 6, indicating the near error of the long input. Signal *R2* in Fig 10C also has a rise at the  
537 same place in each cycle, but it is barely visible because the input *R1* to the second toggle has a  
538 slightly shorter duration than the input Ring to the first toggle. Similarly, the pulse duration of  
539 *R2* is slightly shorter than that of *R1*. If neurons have this behavior of a slight shortening of each  
540 input pulse to consecutive toggles in the cascade, it makes the cascade more robust because a  
541 pulse duration of four state changes is near the upper bound on pulse durations that can  
542 successfully invert the JK toggle.

#### 543 **2.3.4. The relationship between the distributions of neuron delay times and cascaded** 544 **neural oscillators' frequencies**

545 The distributions of cascaded neural oscillators' frequencies are determined by the mean  
546 and variance of neuron delay times of the cascades' initial oscillators.



547 **2.3.4.1. Exact relationships between inverter delay times and cascaded oscillator**  
548 **frequencies**

549 The interest here is in neural inverters and toggles, but the arguments in this section apply  
550 to any implementation of inverters and toggles, including electronic. These results may not be  
551 found in electronics texts because engineers are not normally concerned with the small variances  
552 in component performance.

553 **2.3.4.1.1. Distributions of oscillator periods and frequencies**

554 As noted earlier, each cycle time of a ring oscillator is the sum of the times it takes for  
555 each inverter to invert twice. If  $X_1, \dots, X_n$  are independent and identically distributed random  
556 variables representing the delay times of  $n$  inverters in a ring oscillator, the ring oscillator's  
557 period is:

558 4.  $P = 2(X_1 + \dots + X_n)$

559 If toggles are connected in sequence with the oscillator, each cycle time of each toggle's output is  
560 the sum of two of the input's cycle times. Cascaded toggle number  $k = 1, 2, \dots$  has period:

561 5.  $P_k = 2^k P$

562 The mean and standard deviation of the delay times of the inverters in ring oscillators in  
563 all cascaded toggles are denoted by  $\mu_d$  and  $\sigma_d$ . By equations 4 and 5 and the elementary  
564 properties of random variables, for  $i = 1, 2, \dots$  (with  $i = 1$  representing the initial ring oscillator),  
565 the period of cascaded oscillator number  $i$  has mean and standard deviation:

566 6.  $\mu_i = 2^i n \mu_d, \sigma_i = 2^i \sqrt{n} \sigma_d$

567 The factor  $2^i$  shows the octave relationship between the oscillators' distributions of periods.

568 The oscillators' distributions of frequencies can be derived from the distributions of  
569 periods by straightforward calculus. If periods and frequencies are measured in milliseconds and  
570 hertz, respectively, then frequency = C/period for C = 1,000. If the probability density function  
571 (PDF) of the period of oscillator  $i = 1, 2, \dots$  (with  $i = 1$  representing the initial ring oscillator) is  
572  $f_i(x)$ , then the PDF of the frequency of oscillator  $i$  is:

573 7.  $g_i(x) = Cf_i(C/x)/x^2$

574 Equation 7 shows the oscillator period and frequency distributions are different. For  
575 example, it will be seen that if the periods are normally distributed, the frequency distributions  
576 are skewed to the right. But the intersections of consecutive period PDFs (converted to  
577 frequencies) are the same as the intersections of consecutive frequency PDFs because  $x^2$  and the  
578 initial constant C in equation 7 drop out of the equation  $g_i(x) = g_{i+1}(x)$ .

#### 579 **2.3.4.1.2. Normal distributions**

580 If inverter delay times are normally distributed, then by equations 4 and 5 and the  
581 elementary properties of normal distributions, the periods of ring oscillators and cascaded  
582 toggles are also normally distributed.

583 The normal PDF with mean  $\mu$  and standard deviation  $\sigma$ , whose graph is commonly  
584 known as the bell curve, is:

585 8.  $f(x) = \exp[-(x-\mu)^2/(2\sigma^2)]/\sqrt{(2\pi\sigma^2)}$

586 Equation 8 implies that a normal distribution is entirely determined by its mean and standard  
587 deviation. By equations 6 and 7, this means cascaded oscillators' distributions of periods and  
588 frequencies are entirely determined by the number of inverters  $n$  in the initial ring oscillators and  
589 the inverter delay parameters  $\mu_d$  and  $\sigma_d$ .

590 Substituting the cascaded oscillators' period parameters in equation 6 into equation 8 to  
591 obtain the period PDFs  $f_i(x)$ , the intersections of each pair of consecutive period PDFs can be  
592 found by elementary algebra. For  $i = 1, 2, \dots$ , ( $i = 1$  representing the ring oscillator), the  
593 intersection of  $f_i(x)$  and  $f_{i+1}(x)$  occurs at period:

$$594 \quad 9. \text{ Intersection}(i) = 2^i(2/3) \{n\mu_d + \sqrt{[(n\mu_d)^2 + 6n\sigma_d^2 \ln(2)]}\} \text{ ms}$$

595 The factor  $2^i$  shows the intersections also have the octave relationship.

596 By substituting the period PDFs  $f_i$  obtained from equations 6 and 8 into equation 7, the  
597 peak frequency (mode) for PDF  $g_i$  can be found by calculus:

$$598 \quad 10. \text{ mode}(i) = \{250/(2^i n \sigma_d^2)\} \{-n\mu_d + \sqrt{[(n\mu_d)^2 + 8n\sigma_d^2]}\} \text{ Hz}$$

599 Again, the factor  $2^i$  shows the peak frequencies also have the octave property. These peak  
600 frequencies are close to, but not the same as, the peak frequencies  $1,000/\mu_i$  derived from the  
601 means  $\mu_i$  of the period's normal distributions in equation 6.

#### 602 **2.3.4.2. Neuron delay times**

603 Since neuron delay times are determined by several factors, the delay times are  
604 approximately normally distributed (by the central limit theorem). For small networks with  
605 chemical synapses, nearly all of the delay occurs at the synapses. Several studies have measured  
606 synapse delay times [e.g., 32, 33], but the literature apparently does not have empirical estimates  
607 of the parameters (mean and variance) of the delay times' distribution. However, a description of  
608 the range of synapse delay times is "at least 0.3 ms, usually 1 to 5 ms or longer" [25]. Although  
609 the description is far from precise, delay time parameters can be estimated.

610 The description of the range has two parts. The first part "at least 0.3 ms" seems to refer  
611 to all observations. The second part "usually 1 to 5 ms or longer" seems to describe the ranges of  
612 typical samples, with "5 ms or longer" representing the ranges' right endpoints. In that case, the

613 interval [1 ms, 7 ms] is at least a reasonable, rough estimate of the range of a moderately sized  
614 sample.

615 If only the range of a sample (minimum value,  $m$ , and maximum,  $M$ ) is known, the  
616 midpoint can be used as an estimate of the mean of a distribution. Simulations have shown that  
617  $(M - m)/4$  is the best estimator of the standard deviation for moderately sized samples [34].  
618 Based on this and the estimated range [1 ms, 7 ms], neuron delay times are estimated to have  
619 distribution parameters:

620 11.  $\mu_d = 4 \text{ ms}$ ,  $\sigma_d = 1.5 \text{ ms}$

621 For a normal distribution with these parameters, about 99.3% of the distribution is at least 0.3  
622 ms. This agrees well with the description “at least 0.3 ms.” About 73% lies between 1 and 5 ms,  
623 and 95% is between 1 and 7 ms. This agrees reasonably well with the description “usually 1 to 5  
624 ms or longer.”

### 625 **2.3.4.3. EEG frequency distribution compared to estimated neural oscillator frequency** 626 **distributions**

627 The graphs of the estimated frequency PDFs of five cascaded neural oscillators are  
628 shown in Fig 11. As before, the period PDFs  $f_i(x)$  are obtained by substituting the period  
629 parameters in equation 6 into equation 8. With the estimated delay parameters of equations 11  
630 and  $n = 3$  neurons for the ring oscillator, the estimated frequency PDFs  $g_i(x)$  are obtained from  
631 equation 7. The four intersections of consecutive PDFs, shown in blue, are found by converting  
632 the periods given by equation 9 to frequencies. The five PDF modes, shown in yellow, are  
633 obtained from equation 10. Frequencies that are commonly cited [9-12, 35-52] as partition  
634 points separating the EEG frequency bands and peak frequencies of three of the bands are shown  
635 in red and green, respectively. Numbers in parentheses show how many times each frequency

636 was cited. (Estimates of peak frequencies apparently have not been found for the lower  
 637 frequency delta and theta bands.)  
 638

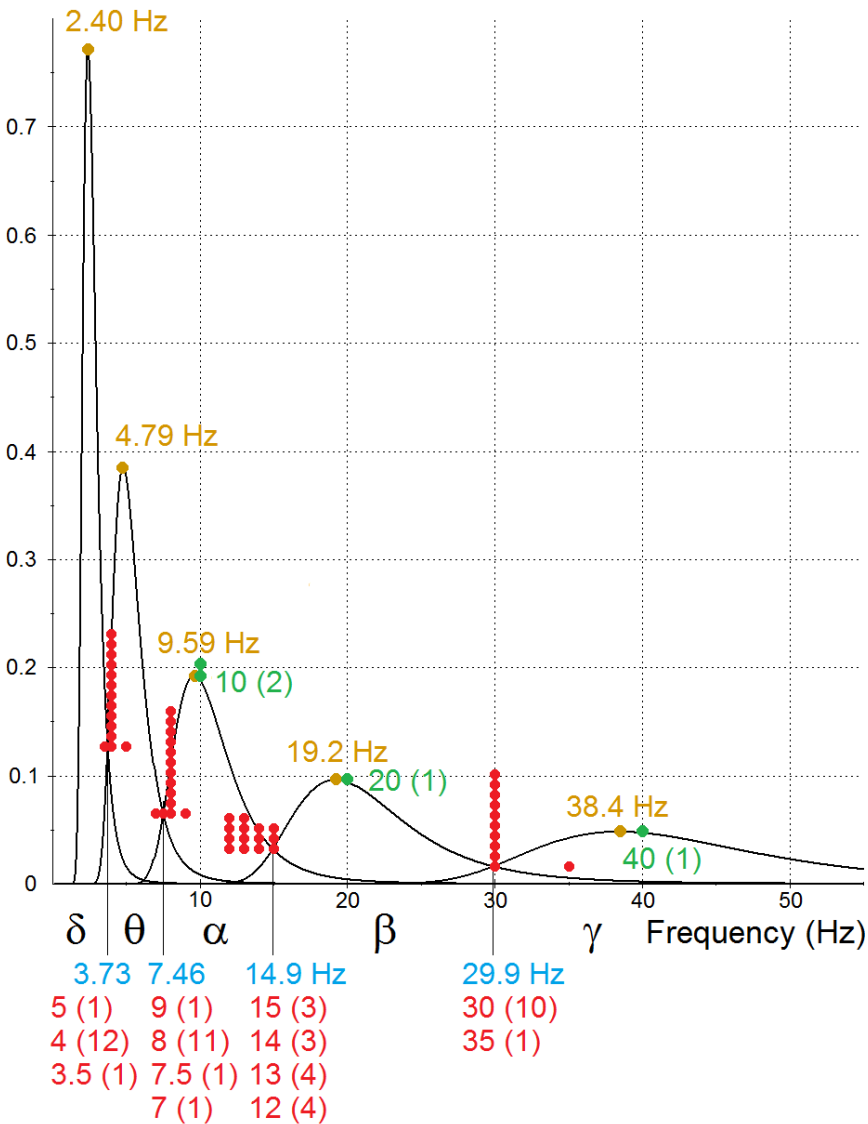

639

640 **Fig 11. Estimated frequency distributions of cascaded neural oscillators compared to**  
 641 **commonly cited EEG frequency band peaks and boundaries.** The graphs are the estimated  
 642 PDFs of the frequencies of a three-neuron ring oscillator and four cascaded toggles. The PDFs  
 643 were determined solely by the estimated mean and variance of neuron delay times. The five  
 644 intervals defined by the intersections of consecutive PDFs are labeled with Greek letters to

645 distinguish them from EEG frequency bands, which are often written in the Roman alphabet.  
646 The intersections and modes are labeled in blue and yellow, respectively. Also shown in red and  
647 green are frequencies that are commonly cited as partition points separating the EEG frequency  
648 bands and peak frequencies of three of the bands. Numbers in parentheses and numbers of data  
649 points show how many times each frequency was found to be cited in a literature search. As  
650 predicted by the cascaded oscillators hypothesis, the graphs show that the modes and  
651 intersections of the estimated oscillator frequency PDFs are close to the peaks and partition  
652 points commonly cited for the EEG frequency bands, respectively.

### 653 **2.3.5. Synchronization**

654 The EEG frequency bands and associated behavioral and mental states are consistent with  
655 the advantages of synchronous logic systems. Cascaded oscillators can produce the frequencies  
656 found in EEGs.

#### 657 **2.3.5.1. Synchronous logic systems**

658 Logic systems have a timing problem in ensuring the various subcircuits change states in  
659 the correct chronological sequence. Synchronous logic systems generally have simpler circuit  
660 architecture and fewer errors than asynchronous systems. This is the reason nearly all electronic  
661 logic systems are synchronized by an enabling pulse to each component circuit. The enabling  
662 pulse in such systems is usually produced by an oscillator. The enabling input in Fig 3E and the  
663 oscillators in Fig 9 illustrate how such synchronization is possible with neural networks.

664 Timing problems are greater in sequential logic than in combinational logic, and greater  
665 in parallel processing than in serial processing. Much of the information processing in the brain  
666 involves sequential logic and nearly all of it is parallel. This means the selective pressure for  
667 synchronization in the brain would have been high, and the neural implementation proposed here  
668 is quite simple.

669           The processing speed in a synchronous system depends largely on the enabling  
670 oscillator's speed. A large system like the brain that performs many diverse functions may have  
671 several different processing speed requirements. The trade-off for greater processing speed is a  
672 higher error rate. Functions that can tolerate a few errors, and that need fast results with many  
673 simultaneous small computations, require high processing speeds. Functions that are less  
674 dependent on speed or massive computation, or that require few errors, or whose component  
675 networks are large and complex and therefore slow to change state, call for slower processing.

#### 676 **2.3.5.2. Synchronization and EEG frequency bands**

677           The EEG frequency bands and associated behavioral and mental states are consistent with  
678 the function of multiple frequencies that was suggested in the preceding paragraph. Gamma  
679 waves (high frequencies) are associated with vision [53, 54] and hearing [14], which make sense  
680 out of massive data input in a few milliseconds. Beta waves are associated with purposeful  
681 mental effort [25], which may involve less data input while requiring few errors and complex  
682 operations. Alpha waves are associated with relaxed wakefulness [16], theta waves with  
683 working memory and drowsiness [25, 55], and delta waves with drowsiness and sleep [25].  
684 These categories require successively slower information processing, and they have  
685 corresponding EEG bands of lower frequencies.

686           The high frequencies provided by the three-neuron ring oscillator and the wide variety of  
687 frequencies provided by cascaded toggles can produce this neural activity, as shown in Fig 11.  
688 The enabling signal from a neural oscillator (as illustrated in Fig 3E) can synchronize state  
689 changes in neural structures. The enabling pulse by itself does not produce state changes. When  
690 state changes do occur, the enabling pulse only ensures that they occur at regular times to avoid  
691 timing errors. So the initial ring oscillator's high frequency signal could simply be connected  
692 directly and permanently to the enabling gates of networks in the visual and auditory cortexes,

693 the first toggle's signal connected to networks in the prefrontal cortex for purposeful mental  
694 effort, etc.

695 Providing synchronization for large numbers of neural structures performing many  
696 diverse brain functions would likely require more than a single cascade of oscillators. Only  
697 neural structures that are processing the same information need to be synchronized. Another set  
698 of structures processing different information could be synchronized by an oscillator in a  
699 different cascade. Because of the variation in delay times in different cascades' initial ring  
700 oscillators, several cascades of oscillators could produce several different frequencies in each  
701 band simultaneously. A large number of neural structures synchronized in this way by many  
702 cascaded oscillators could exhibit the bands of matched periods found in EEGs.

### 703 **3. Results and discussion**

#### 704 **3.1. Explanations of known phenomena**

##### 705 **3.1.1. Short-term memory controversy**

706 Cascaded oscillators and NFFs suggest a resolution to the question of whether short-term  
707 memory depends on neurons firing persistently or in brief, coordinated bursts [5, 6]: Memory is  
708 stored by persistent firing in flip-flops [4], and the coordinated bursts observed along with the  
709 persistent firing are due to the stored information being processed by several neural structures  
710 whose state changes are synchronized by a neural oscillator. An example of such short-term  
711 memory processing is a telephone number being reviewed in a phonological loop.

##### 712 **3.1.2. Electroencephalography**

###### 713 **3.1.2.1. The cascaded oscillators hypothesis**

714 The hypothesis that cascaded oscillators produce EEG frequencies is supported by the  
715 available data for neuron delay times and EEG frequency band peaks and boundaries, as shown



716 in Fig 11. The oscillators' designs and estimated frequency distributions graphed in Fig 11 can  
717 be derived directly from selective pressure for a biologically useful function without regard to  
718 EEG data. The useful function is synchronization of state changes in neural structures to avoid  
719 timing errors. In the tradeoff between speed and accuracy, the selective pressure is for a wide  
720 variety of enabling frequencies for diverse brain functions, including high frequencies for some  
721 information to be processed as fast as possible.

722 Cascaded oscillators provide a micro-level explanation of macro-level phenomena: The  
723 entire distribution of EEG frequencies in bands is determined by only two parameters - the mean  
724 and variance of neuron delay times.

725 EEG frequencies have two anomalous properties that are by-products of the cascaded  
726 oscillator solution to selective pressures, but otherwise have no apparent function: the octave  
727 relationship between EEG frequency bands and the close match between the distributions of  
728 EEG gamma frequencies and three-neuron ring oscillator frequencies. This makes it implausible  
729 that EEG phenomena are produced by a mechanism that is fundamentally different from  
730 cascaded oscillators.

### 731 **3.1.2.2. Answers to 16 questions raised by EEG phenomena**

732 The cascaded oscillators hypothesis answers the questions in the section on unexplained  
733 EEG phenomena.

734 *What produces the widespread, synchronized, periodic firing?* 1) The firing is produced  
735 by cascaded oscillators. 2) The firing is periodic because neural structures are being enabled by  
736 oscillators. 3) The periodic firing is widespread because many neural structures are being  
737 enabled. 4) The firing is synchronized because a group of neural structures is being enabled by  
738 the same oscillator.

739 *What is the function of this widespread synchronization?* 5) The function of  
740 synchronization is timing error avoidance in processing information.

741 *What produces and what is the function of the wide distribution of EEG frequencies in*  
742 *bands?* 6) The frequencies occur in bands because each band is produced by a different  
743 oscillator. 7) The wide distribution of frequencies is due to the octave relationship between  
744 cascaded oscillators (100% exponential growth in periods with each successive oscillator by  
745 equation 5) and five oscillators. 8) The distribution of frequencies within each band is  
746 determined by the mean and variance of neuron delay times in the initial oscillators in the  
747 cascades (equations 6). 9) The function of the wide distribution of frequencies is meeting the  
748 needs of diverse brain functions in the trade-off between speed and accuracy.

749 *What produces the unimodal distribution in each band and the octave relationships*  
750 *between the peaks and boundaries?* 10) The unimodal distributions are due to the normal  
751 distribution of neuron delay times in the initial ring oscillators in cascades of oscillators. This  
752 makes the distribution of periods of each oscillator normal and the distributions of frequencies  
753 unimodal. 11) The ratio of consecutive boundaries and peak locations is 2 because consecutive  
754 cascaded oscillators increase the oscillation period by a factor of 2 (equations 5, 9, 10).

755 *What determines the specific frequencies of the peaks and boundaries?* The number of  
756 neurons in the ring oscillators must be the minimum of 3 to produce the high frequencies in the  
757 gamma band. 12) Equations 9 and 10 show the EEG band boundaries and 13) peaks are  
758 determined by this number ( $n = 3$ ), the ring oscillators' delay parameters  $\mu_d$  and  $\sigma_d$ , and the  
759 boundary or peak number  $i$ .

760 *Why do gamma oscillations peak at about 40 Hz?* 14) The three-neuron ring oscillator is  
761 the fastest neural ring oscillator. The estimated peak frequency from equation 10 is 38.4 Hz  
762 (illustrated in Fig 11).

763 *Why does the gamma band contain frequencies that are considerably faster than 40 Hz?*

764 The frequencies vary because of the variance in neuron delay times in the cascades' initial  
765 oscillators. 15) As Fig 11 illustrates, all of the oscillator frequency distributions are skewed to  
766 the right, with the initial oscillator producing frequencies substantially greater than 40 Hz. In the  
767 particular estimate of Fig 11, 2% of the frequencies are greater than 75 Hz, and 0.4% are greater  
768 than 100 Hz.

769 *Why is there little agreement on the boundaries separating the EEG bands?* 16) The  
770 oscillators hypothesis implies that the estimates of EEG band boundaries are estimates of the  
771 intersections of the oscillators' PDFs. This makes estimating boundaries difficult for two  
772 reasons.

773 The oscillators hypothesis implies that the probability of an EEG frequency being  
774 observed has a local minimum near each intersection of consecutive oscillator PDFs (Fig 11).  
775 This means that in a random sample of observed EEG frequencies, relatively few will be near the  
776 intersections. A small number of data points has a negative effect on the accuracy of estimates.

777 The overlapping oscillator PDFs (Fig 11) imply that the distributions of EEG frequencies  
778 associated with the various behavioral and mental states have overlapping ranges rather than  
779 discrete bands. Because two PDFs are equal at their intersection, a frequency near the  
780 intersection of two PDFs is almost equally likely to be produced by either of two oscillators.  
781 That is, an observed EEG frequency near a band "boundary" is almost equally likely to be  
782 observed along with the behavioral and mental state that defines the band on either side of the  
783 intersection. This makes obtaining accurate estimates of band "boundaries" especially difficult.

### 784 **3.1.3. A possible relationship between cascaded oscillators and epilepsy**

785 Oscillations found in EEGs have a wide variety of frequencies, including high  
786 frequencies. These two properties necessitate a low tolerance for error in the duration of the

787 input pulse to the oscillators proposed here. Irregularities such as variations in neuron delay  
788 times could cause serious errors in an oscillator's output. Depending on the type of error that  
789 occurs, neural structures that are synchronized by the oscillator would either be disabled or  
790 enabled but unsynchronized. The resulting timing errors in neural firing and the brain's efforts to  
791 deal with them may cause the abnormal electrical activity characteristic of epileptic seizures.

## 792 **3.2. A simple, rigorous, statistical test of the cascaded oscillators hypothesis**

### 793 **3.2.1. The data problem**

794 Although the hypothesis that cascaded oscillators produce EEG phenomena is consistent  
795 with available data, as illustrated in Fig 11, the data are too imprecise for a rigorous statistical  
796 test of the hypothesis. The estimates found here for the neuron delay time parameters  $\mu_d$  and  $\sigma_d$   
797 were based on a description of the range of synapse delay times [25]. Available estimates of the  
798 EEG frequency bands' peak frequencies are few and available only for three of the five major  
799 frequency bands. Estimates of band boundaries vary widely for reasons implied by the cascaded  
800 oscillators hypothesis as explained in the previous section. Estimates of both peaks and  
801 boundaries are routinely rounded to whole numbers. Some researchers do not even attempt to  
802 estimate a boundary separating two bands, instead giving a whole number frequency as the upper  
803 endpoint of one band and the next consecutive whole number as the lower endpoint of the next  
804 band. Estimates of means and variances of both neuron delay times and EEG frequency bands  
805 are apparently nonexistent.

### 806 **3.2.2. A simple test of the cascaded oscillators hypothesis from sampling data**

807 A simple, rigorous test of the cascaded oscillators hypothesis is possible. All EEG  
808 phenomena predicted by the hypothesis follow from the main implication that the EEG bands  
809 and cascaded oscillators have the same distributions of frequencies. This implication can be  
810 tested statistically with random samples and the distribution relations of equations 6. As

811 discussed previously, neuron delay times should be approximately normally distributed by the  
812 central limit theorem. This implies cascaded oscillator periods are also approximately normally  
813 distributed. A normal distribution is completely determined by its mean and variance. So it  
814 remains to be shown that EEG band periods are normally distributed and that the five main EEG  
815 band periods and five cascaded oscillator periods have equal means and variances.

816         The neuron delay time parameters  $\mu_d$  and  $\sigma_d$  can be estimated from a random sample of  
817 neuron delay times. These estimates can be used to estimate the oscillator period distribution  
818 parameters  $\mu_i$  and  $\sigma_i$  from equations 6. The mean and variance of the periods of one or more  
819 EEG bands can be estimated from a random sample of EEG periods (or frequencies). With  
820 standard tests for equal means and variances, the EEG estimates can be compared to the  
821 oscillator estimates of  $\mu_i$  and  $\sigma_i$ . The EEG sampling data can also be used to test EEG band  
822 periods for normal distributions. If the application of the central limit theorem to neuron delay  
823 times may be questionable, neuron delay times can also be tested for a normal distribution with  
824 the neuron delay time sampling data.

### 825 **3.2.3. Caveats**

826         Because the oscillators' frequency ranges overlap (Fig 11), the band to which an  
827 observed EEG period or frequency is assigned should be determined by the observed behavioral  
828 and mental state that defines a band, not by predetermined endpoints of bands. If EEG sampling  
829 data are measured in frequencies, they must be converted to periods before computing the  
830 sample mean and variance. (The period of the sample mean of frequencies is not the same as the  
831 sample mean of periods.) Sampling data should not be rounded to whole numbers. In using  
832 equations 6 to find the estimated oscillator parameters, recall that the value of  $n$  must be the  
833 minimum of 3. Sampling data for neuron delay times and EEG periods (or frequencies), or even  
834 estimates of means and variances, may already be available in some database.

835           Although it is possible that EEG frequencies are produced by cascaded oscillators with  
836 initial oscillators that are made up of specialized neurons whose delay times are different from  
837 the general population of neurons, this appears to be unlikely. Fig 11 shows the EEG frequency  
838 distributions are at least close to the values predicted by the general description of the range of  
839 neuron delay times that was used here to estimate oscillator neuron delay time parameters.  
840 Moreover, neurons in general and initial oscillator neurons in particular may have both evolved  
841 under selective pressure to function as fast as possible.

#### 842 **4. Acknowledgements**

843           The simulations were done with MS Excel and CircuitLab. Network diagrams were  
844 created with CircuitLab and MS Paint. Graphs were created with MS Excel, Converge 10.0, and  
845 MS Paint. Predicted probabilities of high EEG frequencies were approximated with Converge  
846 10.0. The author would like to thank Duncan Watson, Arturo Tozzi, David Garmire, Paul  
847 Higashi, Anna Yoder Higashi, Sheila Yoder, and especially Ernest Greene and David Burrell for  
848 their support and many helpful comments.

#### 849 **5. References**

- 850 1. Yoder L. Relative absorption model of color vision. *Color Research & Application*. 2005  
851 Aug 1;30(4):252-64.
- 852 2. Yoder L. Explicit Logic Circuits Discriminate Neural States. *PloS one*. 2009 Jan  
853 7;4(1):e4154.
- 854 3. Yoder L. Explicit logic circuits predict local properties of the neocortex's physiology and  
855 anatomy. *PloS one*. 2010 Feb 16;5(2):e9227.
- 856 4. Yoder L. Neural Flip-Flops I: Short-Term Memory. *bioRxiv*. 2020 May 24:403196.

- 857 5. Lundqvist M, Herman P, Miller EK. Working memory: delay activity, yes! persistent  
858 activity? Maybe not. *Journal of Neuroscience*. 2018 Aug 8;38(32):7013-9.
- 859 6. Constantinidis C, Funahashi S, Lee D, Murray JD, Qi XL, Wang M, Arnsten AF. Persistent  
860 spiking activity underlies working memory. *Journal of Neuroscience*. 2018 Aug  
861 8;38(32):7020-8.
- 862 7. Fuster JM, Alexander GE. Neuron activity related to short-term memory. *Science*. 1971 Aug  
863 13;173(3997):652-4.
- 864 8. Funahashi S, Bruce CJ, Goldman-Rakic PS. Mnemonic coding of visual space in the  
865 monkey's dorsolateral prefrontal cortex. *Journal of neurophysiology*. 1989 Feb 1;61(2):331-  
866 49.
- 867 9. Posthuma D, Neale MC, Boomsma DI, De Geus EJ. Are smarter brains running faster?  
868 Heritability of alpha peak frequency, IQ, and their interrelation. *Behavior genetics*. 2001 Nov  
869 1;31(6):567-79.
- 870 10. Johnson L, Lubin A, Naitoh P, Nute C, Austin M. Spectral analysis of the EEG of dominant  
871 and non-dominant alpha subjects during waking and sleeping. *Electroencephalography and  
872 Clinical Neurophysiology*. 1969 Apr 30;26(4):361-70.
- 873 11. Baumgarten TJ, Oeltzschner G, Hoogenboom N, Wittsack HJ, Schnitzler A, Lange J. Beta  
874 Peak Frequencies at Rest Correlate with Endogenous GABA+/Cr Concentrations in  
875 Sensorimotor Cortex Areas. *PloS one*. 2016 Jun 3;11(6):e0156829.
- 876 12. Voss U, Holzmann R, Tuin I, Hobson JA. Lucid dreaming: a state of consciousness with  
877 features of both waking and non-lucid dreaming. *Sleep*. 2009 Sep 1;32(9):1191-200.

- 878 13. Glassman RB. Hypothesized neural dynamics of working memory: Several chunks might be  
879 marked simultaneously by harmonic frequencies within an octave band of brain waves. *Brain*  
880 *Research Bulletin*. 1999 Sep 15;50(2):77-93.
- 881 14. Mably AJ, Colgin LL. Gamma oscillations in cognitive disorders. *Current opinion in*  
882 *neurobiology*. 2018 Oct 1;52:182-7.
- 883 15. Uhlhaas PJ, Haenschel C, Nikolić D, Singer W. The role of oscillations and synchrony in  
884 cortical networks and their putative relevance for the pathophysiology of schizophrenia.  
885 *Schizophrenia bulletin*. 2008 Sep 1;34(5):927-43.
- 886 16. Kuramoto Y. *Chemical oscillations, waves, and turbulence*. Springer Science & Business  
887 Media; 2012 Dec 6.
- 888 17. Destexhe A, Rudolph M, Paré D. The high-conductance state of neocortical neurons in vivo.  
889 *Nature reviews neuroscience*. 2003 Sep;4(9):739-51.
- 890 18. Fink CG, Gliske S, Catoni N, Stacey WC. Network mechanisms generating abnormal and  
891 normal hippocampal high-frequency oscillations: a computational analysis. *Eneuro*. 2015  
892 May;2(3).
- 893 19. Bensaid S, Modolo J, Merlet I, Wendling F, Benquet P. COALIA: a computational model of  
894 human EEG for consciousness research. *Frontiers in systems neuroscience*. 2019 Nov  
895 13;13:59.
- 896 20. Vijayan S, Kopell NJ. Thalamic model of awake alpha oscillations and implications for  
897 stimulus processing. *Proceedings of the National Academy of Sciences*. 2012 Nov  
898 6;109(45):18553-8.
- 899 21. Jefferys JG, Traub RD, Whittington MA. Neuronal networks for induced '40 Hz' rhythms.  
900 *Trends in neurosciences*. 1996 May 1;19(5):202-8.



- 901 22. Whittington MA, Cunningham MO, LeBeau FE, Racca C, Traub RD. Multiple origins of the  
902 cortical gamma rhythm. *Developmental neurobiology*. 2011 Jan 1;71(1):92-106.
- 903 23. Destexhe A. In Silico, Computer Simulations from Neurons up to the Whole Brain. *Eneuro*.  
904 2021 Mar;8(2).
- 905 24. Okun M, Lampl I. Balance of excitation and inhibition. *Scholarpedia*. 2009 Aug  
906 16;4(8):7467.
- 907 25. Kandel E, Schwartz J, Jessell T, Siegelbaum SA, Hudspeth AJ. *Principles of neural science*.  
908 McGraw-Hill Professional. New York, NY. 2013:160, 178, 1119.
- 909 26. Eggermann E, Bayer L, Serafin M, Saint-Mleux B, Bernheim L, Machard D, Jones BE,  
910 Mühlethaler M. The wake-promoting hypocretin–orexin neurons are in an intrinsic state of  
911 membrane depolarization. *Journal of Neuroscience*. 2003 Mar 1;23(5):1557-62.
- 912 27. Hopfield JJ. Neurons with graded response have collective computational properties like  
913 those of two-state neurons. *Proceedings of the national academy of sciences*. 1984 May  
914 1;81(10):3088-92.
- 915 28. Mysore SP, Knudsen EI. Reciprocal inhibition of inhibition: a circuit motif for flexible  
916 categorization in stimulus selection. *Neuron*. 2012 Jan 12;73(1):193-205.
- 917 29. Carvalho TP, Buonomano DV. Differential effects of excitatory and inhibitory plasticity on  
918 synaptically driven neuronal input-output functions. *Neuron*. 2009 Mar 12;61(5):774-85.
- 919 30. Yoder L, inventor. Logic circuits with and-not gate for fast fuzzy decoders. United States  
920 patent US 9,684,873. 2017 Jun 20.
- 921 31. Yoder L, inventor. Systems and methods for brain-like information processing. United States  
922 patent US 8,655,797. 2014 Feb 18.

- 923 32. Adhikari BM, Prasad A, Dhamala M. Time-delay-induced phase-transition to synchrony in  
924 coupled bursting neurons. *Chaos: An Interdisciplinary Journal of Nonlinear Science*. 2011  
925 Jun;21(2):023116.
- 926 33. Katz B, Miledi R. The measurement of synaptic delay, and the time course of acetylcholine  
927 release at the neuromuscular junction. *Proceedings of the Royal Society of London B:*  
928 *Biological Sciences*. 1965 Feb 16;161(985):483-95.
- 929 34. Hozo SP, Djulbegovic B, Hozo I. Estimating the mean and variance from the median, range,  
930 and the size of a sample. *BMC Medical Research Methodology*. 2005;5:13.
- 931 35. "System and method of measuring and correlating human physiological characteristics such  
932 as brainwave frequency." U.S. Patent 3,875,930, issued April 8, 1975.
- 933 36. Nunez PL. A study of origins of the time dependencies of scalp EEG: I-theoretical basis.  
934 *IEEE Transactions on Biomedical Engineering*. 1981 Mar(3):271-80.
- 935 37. Nunez PL. A study of origins of the time dependencies of scalp EEG: II-experimental  
936 support of theory. *IEEE Transactions on Biomedical Engineering*. 1981 Mar(3):281-8.
- 937 38. Teplan M. Fundamentals of EEG measurement. *Measurement science review*. 2002;2(2):1-1.
- 938 39. David O, Friston KJ. A neural mass model for MEG/EEG:: coupling and neuronal dynamics.  
939 *NeuroImage*. 2003 Nov 30;20(3):1743-55.
- 940 40. Ergenoglu T, Demiralp T, Bayraktaroglu Z, Ergen M, Beydagi H, Uresin Y. Alpha rhythm of  
941 the EEG modulates visual detection performance in humans. *Cognitive Brain Research*. 2004  
942 Aug 31;20(3):376-83.
- 943 41. Mormann F, Fell J, Axmacher N, Weber B, Lehnertz K, Elger CE, Fernández G.  
944 Phase/amplitude reset and theta–gamma interaction in the human medial temporal lobe

- 945 during a continuous word recognition memory task. *Hippocampus*. 2005 Jan 1;15(7):890-  
946 900.
- 947 42. König T, Prichep L, Dierks T, Hubl D, Wahlund LO, John ER, Jelic V. Decreased EEG  
948 synchronization in Alzheimer's disease and mild cognitive impairment. *Neurobiology of*  
949 *aging*. 2005 Feb 28;26(2):165-71.
- 950 43. Flagg RH, Barham WB, Stokes DA, Kotapish GE, inventors; Flagg Rodger H, Barham W  
951 Bruce, assignee. Method and apparatus for magnetic brain wave stimulation. United States  
952 patent US 6,978,179. 2005 Dec 20.
- 953 44. Herrmann CS, Demiralp T. Human EEG gamma oscillations in neuropsychiatric disorders.  
954 *Clinical neurophysiology*. 2005 Dec 31;116(12):2719-33.
- 955 45. Palva S, Palva JM. New vistas for  $\alpha$ -frequency band oscillations. *Trends in neurosciences*.  
956 2007 Apr 30;30(4):150-8.
- 957 46. Jensen O, Colgin LL. Cross-frequency coupling between neuronal oscillations. *Trends in*  
958 *cognitive sciences*. 2007 Jul 31;11(7):267-9.
- 959 47. Gireesh ED, Plenz D. Neuronal avalanches organize as nested theta-and beta/gamma-  
960 oscillations during development of cortical layer 2/3. *Proceedings of the National Academy*  
961 *of Sciences*. 2008 May 27;105(21):7576-81.
- 962 48. Lagopoulos J, Xu J, Rasmussen I, Vik A, Malhi GS, Eliassen CF, Arntsen IE, Sæther JG,  
963 Hollup S, Holen A, Davanger S. Increased theta and alpha EEG activity during nondirective  
964 meditation. *The Journal of Alternative and Complementary Medicine*. 2009 Nov  
965 1;15(11):1187-92.

- 966 49. Poil SS, Hardstone R, Mansvelder HD, Linkenkaer-Hansen K. Critical-state dynamics of  
967 avalanches and oscillations jointly emerge from balanced excitation/inhibition in neuronal  
968 networks. *Journal of Neuroscience*. 2012 Jul 18;32(29):9817-23.
- 969 50. Thut G, Miniussi C, Gross J. The functional importance of rhythmic activity in the brain.  
970 *Current Biology*. 2012 Aug 21;22(16):R658-63.
- 971 51. McConnell GC, So RQ, Hilliard JD, Lopomo P, Grill WM. Effective deep brain stimulation  
972 suppresses low-frequency network oscillations in the basal ganglia by regularizing neural  
973 firing patterns. *Journal of Neuroscience*. 2012 Nov 7;32(45):15657-68.
- 974 52. Basar E, Basar-Eroglu C, Guntekin B, Yener GG. Brain's alpha, beta, gamma, delta, and  
975 theta oscillations in neuropsychiatric diseases: proposal for biomarker strategies. *Suppl Clin*  
976 *Neurophysiol*. 2013;62(1).
- 977 53. Hughes JR. Responses from the visual cortex of unanesthetized monkeys. In *International*  
978 *review of neurobiology* 1964 Jan 1 (Vol. 7, pp. 99-152). Academic Press.
- 979 54. Gold I. Does 40-Hz oscillation play a role in visual consciousness? *Consciousness and*  
980 *cognition*. 1999 Jun 1;8(2):186-95.
- 981 55. Alekseichuk I, Turi Z, de Lara GA, Antal A, Paulus W. Spatial working memory in humans  
982 depends on theta and high gamma synchronization in the prefrontal cortex. *Current Biology*.  
983 2016 Jun 20;26(12):1513-21.
